# Supplementary material for: The Global Distribution and Drivers of Alien Bird Species Richness
Source: PLoS Biol. 2017 Jan 12;15(1):e2000942. doi: 10.1371/journal.pbio.2000942 (PMC5230740; doi:10.1371/journal.pbio.2000942)
Supplement: S4 Data — (XLSX) [file pbio.2000942.s017.xlsx]

## Sheet: Hexagonal_grid_species_count
hexid	X	Y	Q1_species_count	Q2_species_count	Q3_species_count	Q4_species_count
536	-2.67293e+06	7.29844e+06	0	0	0	0
567	-3.81224e+06	7.29609e+06	0	0	0	0
587	-3.40648e+06	7.29505e+06	0	0	0	0
605	-3.01192e+06	7.2935e+06	0	0	0	0
628	-2.63182e+06	7.29144e+06	0	0	0	0
632	-4.46558e+06	7.29021e+06	0	0	0	0
636	-7.26621e+06	7.29061e+06	1	1	2	0
644	-4.07733e+06	7.28996e+06	0	0	0	0
654	-3.69303e+06	7.28921e+06	0	0	0	0
668	-6.61178e+06	7.2891e+06	1	1	2	0
674	-2.26867e+06	7.28888e+06	0	0	0	0
685	-3.31617e+06	7.28795e+06	0	0	0	0
691	-7.59829e+06	7.28679e+06	1	1	2	0
694	-5.98489e+06	7.28609e+06	1	1	2	0
698	-2.94983e+06	7.28618e+06	0	0	0	0
702	-6.96049e+06	7.28604e+06	1	1	2	0
718	-6.33982e+06	7.28377e+06	1	1	2	0
722	-2.59653e+06	7.28391e+06	0	0	0	0
726	-4.31156e+06	7.28322e+06	0	0	0	0
730	-4.67663e+06	7.28318e+06	0	0	0	0
738	-3.94808e+06	7.28276e+06	0	0	0	0
749	-7.90708e+06	7.28245e+06	1	1	2	0
750	-7.2895e+06	7.28245e+06	1	1	2	0
754	-3.58918e+06	7.28179e+06	0	0	0	0
773	-6.67982e+06	7.28094e+06	1	1	2	0
777	-2.25823e+06	7.28115e+06	0	0	0	0
781	-3.23767e+06	7.28031e+06	0	0	0	0
785	-5.75084e+06	7.28e+06	1	1	2	0
792	-2.89596e+06	7.27834e+06	0	0	0	0
796	-6.09265e+06	7.27791e+06	1	1	2	0
799	-7.59829e+06	7.27834e+06	1	1	2	0
807	-8.19318e+06	7.27758e+06	1	1	2	0
808	-7.00341e+06	7.27758e+06	1	1	2	0
810	-1.93627e+06	7.27788e+06	0	0	0	0
824	-4.51933e+06	7.27588e+06	0	0	0	0
828	-4.17564e+06	7.27571e+06	0	0	0	0
832	-4.86292e+06	7.27556e+06	0	0	0	0
836	-2.56605e+06	7.27586e+06	0	0	0	0
840	-6.42257e+06	7.2753e+06	1	1	2	0
844	-3.83441e+06	7.27502e+06	0	0	0	0
852	-5.20382e+06	7.27472e+06	0	0	0	0
856	-3.49811e+06	7.27384e+06	0	0	0	0
860	-5.53959e+06	7.27337e+06	0	0	0	0
864	-1.63141e+06	7.27411e+06	0	0	0	0
867	-7.88689e+06	7.2737e+06	1	1	2	0
868	-7.3097e+06	7.2737e+06	1	1	2	0
879	-2.24948e+06	7.27288e+06	0	0	0	0
883	-3.16897e+06	7.27215e+06	0	0	0	0
886	-8.45758e+06	7.27217e+06	1	1	2	0
887	-6.73901e+06	7.27217e+06	1	1	2	0
891	-5.86796e+06	7.27151e+06	1	1	2	0
899	-2.84893e+06	7.26996e+06	0	0	0	0
907	-6.187e+06	7.26913e+06	1	1	2	0
911	-1.34396e+06	7.26984e+06	0	0	0	0
915	-1.94731e+06	7.2694e+06	0	0	0	0
918	-7.59829e+06	7.26929e+06	2	1	3	0
924	-8.15575e+06	7.26852e+06	1	1	2	0
925	-7.04084e+06	7.26852e+06	1	1	2	0
929	-4.37929e+06	7.26805e+06	0	0	0	0
933	-4.7044e+06	7.26794e+06	0	0	0	0
941	-4.05508e+06	7.26765e+06	0	0	0	0
942	6.22602e+06	7.26765e+06	0	0	0	0
945	-5.02822e+06	7.26733e+06	0	0	0	0
951	-2.53959e+06	7.26727e+06	0	0	0	0
956	-3.7339e+06	7.26675e+06	0	0	0	0
957	5.90484e+06	7.26675e+06	0	0	0	0
960	-5.34861e+06	7.26621e+06	0	0	0	0
963	-8.70151e+06	7.26623e+06	1	1	2	0
964	-6.49508e+06	7.26623e+06	1	1	2	0
968	-3.41777e+06	7.26535e+06	0	0	0	0
969	5.58871e+06	7.26535e+06	0	0	0	0
975	-5.66358e+06	7.26457e+06	0	0	0	0
979	-1.66019e+06	7.26543e+06	0	0	0	0
983	-1.07381e+06	7.26508e+06	0	0	0	0
986	-7.86921e+06	7.26435e+06	2	1	3	0
987	-7.32737e+06	7.26435e+06	2	1	3	0
991	-2.24217e+06	7.26409e+06	0	0	0	0
995	-3.10849e+06	7.26345e+06	0	0	0	0
996	5.27944e+06	7.26345e+06	0	0	0	0
998	-8.40562e+06	7.26282e+06	1	1	2	0
999	-6.79097e+06	7.26282e+06	1	1	2	0
1007	-5.97132e+06	7.26242e+06	0	0	0	0
1017	-2.80766e+06	7.26105e+06	0	0	0	0
1025	-1.38838e+06	7.26096e+06	0	0	0	0
1029	-4.56216e+06	7.25979e+06	0	0	0	0
1033	-4.25411e+06	7.25968e+06	0	0	0	0
1037	-1.95755e+06	7.26041e+06	0	0	0	0
1040	-8.92633e+06	7.25976e+06	2	1	3	0
1041	-6.27026e+06	7.25976e+06	1	1	2	0
1045	-4.86995e+06	7.2594e+06	0	0	0	0
1053	-3.94766e+06	7.25907e+06	0	0	0	0
1054	6.1186e+06	7.25907e+06	0	0	0	0
1056	-7.59829e+06	7.25965e+06	2	1	3	0
1062	-5.17564e+06	7.2585e+06	0	0	0	0
1065	-8.1228e+06	7.25888e+06	2	1	3	0
1066	-7.07378e+06	7.25888e+06	1	1	2	0
1067	9.24473e+06	7.25888e+06	0	0	0	0
1070	-3.64458e+06	7.25795e+06	0	0	0	0
1071	5.81552e+06	7.25795e+06	0	0	0	0
1074	-2.51654e+06	7.25816e+06	0	0	0	0
1078	-5.47747e+06	7.2571e+06	0	0	0	0
1081	-8.63746e+06	7.25658e+06	1	1	2	0
1082	-6.55913e+06	7.25658e+06	1	1	2	0
1083	8.73007e+06	7.25658e+06	0	0	0	0
1089	-3.34653e+06	7.25634e+06	0	0	0	0
1090	5.51748e+06	7.25634e+06	0	0	0	0
1093	-1.68625e+06	7.25623e+06	0	0	0	0
1097	-5.77379e+06	7.25518e+06	0	0	0	0
1101	-1.1318e+06	7.256e+06	0	0	0	0
1105	-2.23614e+06	7.25477e+06	0	0	0	0
1113	-3.05501e+06	7.25422e+06	0	0	0	0
1114	5.22596e+06	7.25422e+06	0	0	0	0
1116	-7.85361e+06	7.25441e+06	2	1	3	0
1117	-7.34297e+06	7.25441e+06	2	1	3	0
1128	-9.13345e+06	7.25275e+06	2	1	3	0
1129	-6.06313e+06	7.25275e+06	2	0	2	0
1132	-8.35965e+06	7.25287e+06	2	1	3	0
1133	-6.83694e+06	7.25287e+06	1	1	2	0
1134	9.00788e+06	7.25287e+06	0	0	0	0
1140	-2.7713e+06	7.25162e+06	0	0	0	0
1141	4.94224e+06	7.25162e+06	0	0	0	0
1144	-4.43412e+06	7.2511e+06	0	0	0	0
1148	-4.72693e+06	7.25093e+06	0	0	0	0
1152	-4.1418e+06	7.25077e+06	0	0	0	0
1153	6.31274e+06	7.25077e+06	0	0	0	0
1156	-1.4285e+06	7.25156e+06	0	0	0	0
1160	-5.01867e+06	7.25026e+06	0	0	0	0
1164	-1.96717e+06	7.25088e+06	0	0	0	0
1168	-3.85156e+06	7.24994e+06	0	0	0	0
1169	6.0225e+06	7.24994e+06	0	0	0	0
1178	-8.85234e+06	7.2498e+06	2	1	3	0
1179	-6.34424e+06	7.2498e+06	2	1	3	0
1182	7.47872e+06	7.24908e+06	0	0	0	0
1185	-5.30778e+06	7.24908e+06	0	0	0	0
1186	-7.59829e+06	7.24942e+06	2	1	3	0
1189	-3.56487e+06	7.24861e+06	0	0	0	0
1190	5.73581e+06	7.24861e+06	0	0	0	0
1192	-8.0936e+06	7.24864e+06	2	1	3	0
1193	-7.10299e+06	7.24864e+06	1	1	2	0
1194	9.27393e+06	7.24864e+06	0	0	0	0
1196	-2.49644e+06	7.24851e+06	0	0	0	0
1197	4.66738e+06	7.24851e+06	0	0	0	0
1201	-5.59278e+06	7.24739e+06	1	0	1	0
1202	7.76372e+06	7.24739e+06	0	0	0	0
1209	-3.28312e+06	7.24678e+06	0	0	0	0
1210	5.45406e+06	7.24678e+06	0	0	0	0
1212	-8.58049e+06	7.24633e+06	2	1	3	0
1213	-6.61609e+06	7.24633e+06	1	1	2	0
1214	8.78704e+06	7.24633e+06	0	0	0	0
1223	-1.71007e+06	7.2465e+06	0	0	0	0
1227	-1.18426e+06	7.24639e+06	0	0	0	0
1230	-9.32427e+06	7.24519e+06	2	1	3	0
1231	-5.87232e+06	7.24519e+06	2	1	3	0
1239	-2.23126e+06	7.24492e+06	0	0	0	0
1240	4.4022e+06	7.24492e+06	0	0	0	0
1243	-3.00754e+06	7.24446e+06	0	0	0	0
1244	5.17848e+06	7.24446e+06	0	0	0	0
1250	-7.83974e+06	7.24389e+06	2	1	3	0
1251	-7.35684e+06	7.24389e+06	2	1	3	0
1252	9.52779e+06	7.24389e+06	0	0	0	0
1256	2.02326e+06	7.24338e+06	0	0	0	0
1257	-9.05138e+06	7.24247e+06	2	1	3	0
1258	-6.1452e+06	7.24247e+06	2	1	3	0
1262	-4.59738e+06	7.24192e+06	0	0	0	0
1265	9.04883e+06	7.24234e+06	0	0	0	0
1267	-8.3187e+06	7.24234e+06	2	1	3	0
1268	-6.87789e+06	7.24234e+06	1	1	2	0
1270	-4.31852e+06	7.24187e+06	0	0	0	0
1274	-4.87594e+06	7.24147e+06	0	0	0	0
1278	-4.04071e+06	7.24132e+06	0	0	0	0
1279	6.21165e+06	7.24132e+06	0	0	0	0
1282	-2.73918e+06	7.24165e+06	0	0	0	0
1283	4.91013e+06	7.24165e+06	0	0	0	0
1286	-5.15284e+06	7.24052e+06	0	0	0	0
1290	-1.46503e+06	7.24163e+06	0	0	0	0
1295	2.32578e+06	7.24107e+06	0	0	0	0
1297	-3.76528e+06	7.24028e+06	0	0	0	0
1298	5.93622e+06	7.24028e+06	0	0	0	0
1301	-1.97633e+06	7.24083e+06	0	0	0	0
1309	-5.42677e+06	7.23905e+06	2	1	3	0
1312	-8.78619e+06	7.23924e+06	2	1	3	0
1313	-6.4104e+06	7.23924e+06	2	1	3	0
1317	-3.49349e+06	7.23873e+06	0	0	0	0
1318	5.66443e+06	7.23873e+06	0	0	0	0
1320	-7.59829e+06	7.2386e+06	2	1	3	0
1323	-2.47892e+06	7.23834e+06	0	0	0	0
1324	4.64986e+06	7.23834e+06	0	0	0	0
1332	2.62054e+06	7.23814e+06	0	0	0	0
1334	-8.06753e+06	7.23782e+06	2	1	3	0
1335	-7.12906e+06	7.23782e+06	1	1	2	0
1336	9.3e+06	7.23782e+06	0	0	0	0
1338	-9.5001e+06	7.23709e+06	1	0	1	0
1339	-5.69649e+06	7.23709e+06	2	1	3	0
1347	-3.22648e+06	7.2367e+06	0	0	0	0
1348	5.39742e+06	7.2367e+06	0	0	0	0
1351	-1.73204e+06	7.23625e+06	0	0	0	0
1357	1.8382e+06	7.23585e+06	0	0	0	1
1360	3.403e+06	7.23627e+06	0	0	0	0
1362	-8.5295e+06	7.23549e+06	2	1	3	0
1363	-6.66708e+06	7.23549e+06	1	1	2	0
1364	8.83803e+06	7.23549e+06	0	0	0	0
1366	-9.2357e+06	7.2346e+06	2	1	3	0
1367	-5.96089e+06	7.2346e+06	2	1	3	0
1371	-2.22741e+06	7.23454e+06	0	0	0	0
1372	4.39835e+06	7.23454e+06	0	0	0	0
1375	-2.96529e+06	7.23417e+06	0	0	0	0
1376	5.13623e+06	7.23417e+06	0	0	0	0
1384	2.13237e+06	7.23384e+06	0	0	0	0
1386	-4.47976e+06	7.23237e+06	0	0	0	0
1390	-4.74592e+06	7.23214e+06	0	0	0	0
1394	-4.21388e+06	7.2321e+06	0	0	0	0
1397	-7.82733e+06	7.23277e+06	2	1	3	0
1398	-7.36926e+06	7.23277e+06	1	1	2	0
1399	9.5402e+06	7.23277e+06	0	0	0	0
1402	-5.01118e+06	7.23141e+06	0	0	0	0
1405	-8.97761e+06	7.23161e+06	2	1	3	0
1406	-6.21898e+06	7.23161e+06	2	1	3	0
1410	-3.94945e+06	7.23133e+06	0	0	0	0
1413	-8.28199e+06	7.23121e+06	2	1	3	0
1414	-6.9146e+06	7.23121e+06	1	1	2	0
1415	9.08554e+06	7.23121e+06	0	0	0	0
1418	-2.71077e+06	7.23115e+06	0	0	0	0
1419	4.88171e+06	7.23115e+06	0	0	0	0
1423	2.42028e+06	7.2312e+06	0	0	0	0
1425	-5.27437e+06	7.23017e+06	1	0	1	0
1429	-1.49855e+06	7.23118e+06	0	0	0	0
1430	3.66949e+06	7.23118e+06	0	0	0	0
1433	-3.6876e+06	7.23007e+06	0	0	0	0
1434	5.85854e+06	7.23007e+06	0	0	0	0
1438	3.18193e+06	7.23041e+06	0	0	0	0
1441	-1.98516e+06	7.23025e+06	0	0	0	0
1445	1.08547e+06	7.22933e+06	0	1	1	1
1446	-9.66219e+06	7.22844e+06	1	0	1	0
1447	-5.5344e+06	7.22844e+06	2	1	3	0
1453	1.37674e+06	7.2289e+06	0	0	0	1
1455	-3.42938e+06	7.22832e+06	0	0	0	0
1456	5.60032e+06	7.22832e+06	0	0	0	0
1458	-8.72669e+06	7.2281e+06	2	1	3	0
1459	-6.4699e+06	7.2281e+06	1	1	2	0
1465	1.66597e+06	7.22782e+06	0	0	0	1
1468	2.70066e+06	7.22795e+06	0	0	0	0
1471	-2.46367e+06	7.22764e+06	0	0	0	0
1472	4.63461e+06	7.22764e+06	0	0	0	0
1474	9.76924e+06	7.22719e+06	0	0	0	0
1475	-7.59829e+06	7.22719e+06	2	1	3	0
1476	-9.40637e+06	7.22619e+06	2	1	3	0
1477	-5.79022e+06	7.22619e+06	2	1	3	0
1480	-8.04411e+06	7.22641e+06	2	1	3	0
1481	-7.15248e+06	7.22641e+06	1	1	2	0
1482	9.32342e+06	7.22641e+06	0	0	0	0
1485	-3.17576e+06	7.22608e+06	0	0	0	0
1490	1.95165e+06	7.22611e+06	0	0	0	1
1496	-1.75248e+06	7.22548e+06	0	0	0	0
1499	8.88393e+06	7.22406e+06	0	0	0	0
1501	-8.4836e+06	7.22406e+06	2	1	3	0
1503	-9.15568e+06	7.22343e+06	2	1	3	0
1504	-6.0409e+06	7.22343e+06	2	1	3	0
1513	2.23238e+06	7.22377e+06	0	0	0	0
1515	-2.9276e+06	7.22334e+06	0	0	0	0
1519	-2.22453e+06	7.22364e+06	0	0	0	0
1523	-4.62727e+06	7.22226e+06	0	0	0	0
1527	-4.37276e+06	7.22227e+06	0	0	0	0
1531	-4.88147e+06	7.22175e+06	0	0	0	0
1535	-4.11896e+06	7.22178e+06	0	0	0	0
1538	-1.00622e+07	7.22074e+06	1	0	1	0
1539	-5.13434e+06	7.22074e+06	0	0	0	0
1540	7.30528e+06	7.22074e+06	0	0	0	0
1543	-3.86689e+06	7.2208e+06	0	0	0	0
1546	9.55137e+06	7.22108e+06	0	0	0	0
1547	9.9871e+06	7.22108e+06	0	0	0	0
1548	-7.81616e+06	7.22108e+06	2	1	3	0
1549	-7.38043e+06	7.22108e+06	1	1	2	0
1552	2.50693e+06	7.22082e+06	0	0	0	0
1554	-8.91096e+06	7.22015e+06	2	1	3	0
1555	-6.28563e+06	7.22015e+06	2	1	3	0
1559	-2.68563e+06	7.22012e+06	0	0	0	0
1564	945118	7.22008e+06	0	1	1	2
1565	1.22582e+06	7.22008e+06	0	1	1	2
1567	-5.38489e+06	7.21923e+06	1	1	2	0
1568	7.55583e+06	7.21923e+06	0	0	0	0
1571	-3.61749e+06	7.21933e+06	0	0	0	0
1574	-8.2489e+06	7.2195e+06	2	1	3	0
1575	-6.94769e+06	7.2195e+06	1	1	2	0
1576	9.11863e+06	7.2195e+06	0	0	0	0
1585	1.50553e+06	7.21929e+06	0	0	0	1
1591	-1.99378e+06	7.21915e+06	0	0	0	0
1594	-9.56442e+06	7.21722e+06	1	0	1	0
1595	-5.63216e+06	7.21722e+06	2	1	3	0
1601	1.78271e+06	7.21789e+06	0	0	0	0
1603	-3.37168e+06	7.21737e+06	0	0	0	0
1610	-8.6729e+06	7.21636e+06	2	1	3	0
1611	-6.52369e+06	7.21636e+06	1	1	2	0
1612	8.69463e+06	7.21636e+06	0	0	0	0
1615	-2.45046e+06	7.21641e+06	0	0	0	0
1620	2.05608e+06	7.21585e+06	0	0	0	0
1622	-3.13027e+06	7.21492e+06	0	0	0	0
1625	-9.32128e+06	7.21469e+06	2	1	3	0
1626	-5.87531e+06	7.21469e+06	2	1	3	0
1629	-7.59829e+06	7.2152e+06	1	1	2	0
1630	9.76924e+06	7.2152e+06	0	0	0	0
1631	-8.02296e+06	7.21441e+06	2	1	3	0
1632	-7.17363e+06	7.21441e+06	1	1	2	0
1633	9.34457e+06	7.21441e+06	0	0	0	0
1640	-1.77167e+06	7.21418e+06	0	0	0	0
1645	2.32442e+06	7.2132e+06	0	0	0	0
1651	-4.51885e+06	7.21183e+06	0	0	0	0
1657	-4.27526e+06	7.21162e+06	0	0	0	0
1658	-8.44207e+06	7.21205e+06	2	1	3	0
1660	8.92546e+06	7.21205e+06	0	0	0	0
1663	-4.76258e+06	7.21154e+06	0	0	0	0
1667	-2.89397e+06	7.21199e+06	0	0	0	0
1670	-9.08307e+06	7.21166e+06	2	1	3	0
1671	-6.11352e+06	7.21166e+06	2	1	3	0
1674	-2.22255e+06	7.21221e+06	0	0	0	0
1679	-4.0327e+06	7.21092e+06	0	0	0	0
1682	-1.0191e+07	7.21076e+06	1	0	1	0
1683	-5.00556e+06	7.21076e+06	0	0	0	0
1687	1.08547e+06	7.21072e+06	0	1	1	2
1689	-3.79204e+06	7.20973e+06	0	0	0	0
1695	1.35589e+06	7.21028e+06	0	0	0	1
1696	-9.94968e+06	7.20948e+06	1	0	1	0
1697	-5.24691e+06	7.20948e+06	0	0	0	0
1707	1.62467e+06	7.20917e+06	0	0	0	1
1709	-2.66341e+06	7.20856e+06	0	0	0	0
1712	-7.80605e+06	7.20879e+06	2	1	3	0
1713	-7.39054e+06	7.20879e+06	1	1	2	0
1714	9.56148e+06	7.20879e+06	0	0	0	0
1715	9.97699e+06	7.20879e+06	0	0	0	0
1717	-3.55412e+06	7.20805e+06	0	0	0	0
1720	-8.85046e+06	7.20811e+06	2	1	3	0
1721	-6.34613e+06	7.20811e+06	1	1	2	0
1724	-9.71083e+06	7.20769e+06	1	0	1	0
1725	-5.48576e+06	7.20769e+06	0	0	0	0
1729	-1.55837e+06	7.20872e+06	0	0	0	0
1739	1.89059e+06	7.20744e+06	0	0	0	0
1740	-8.21892e+06	7.20721e+06	2	1	3	0
1742	9.14861e+06	7.20721e+06	0	0	0	0
1745	-2.00227e+06	7.20753e+06	0	0	0	0
1749	-3.31968e+06	7.20589e+06	0	0	0	0
1752	-9.47526e+06	7.2054e+06	1	0	1	0
1753	-5.72133e+06	7.2054e+06	1	1	2	0
1758	2.84204e+06	7.20602e+06	0	0	0	0
1762	2.15252e+06	7.20509e+06	0	0	0	0
1764	-2.4391e+06	7.20465e+06	0	0	0	0
1767	-8.62404e+06	7.20404e+06	2	1	3	0
1768	-6.57254e+06	7.20404e+06	1	1	2	0
1772	-3.08942e+06	7.20323e+06	0	0	0	0
1775	-9.24372e+06	7.20261e+06	1	0	1	0
1776	-5.95287e+06	7.20261e+06	1	1	2	0
1779	-7.59829e+06	7.20263e+06	1	1	2	0
1780	9.76924e+06	7.20263e+06	0	0	0	0
1786	-1.78984e+06	7.20236e+06	0	0	0	0
1793	9.36376e+06	7.20183e+06	0	0	0	0
1794	1.01747e+07	7.20183e+06	0	0	0	0
1795	-8.00377e+06	7.20183e+06	2	1	3	0
1796	-7.19282e+06	7.20183e+06	1	1	2	0
1797	-1.07769e+07	7.20085e+06	1	0	1	0
1798	-4.41965e+06	7.20085e+06	0	0	0	0
1801	-1.05431e+07	7.20078e+06	1	0	1	0
1802	-4.65349e+06	7.20078e+06	0	0	0	0
1806	-4.18629e+06	7.20043e+06	0	0	0	0
1814	-4.88704e+06	7.20022e+06	0	0	0	0
1819	954797	7.20077e+06	0	0	0	1
1820	1.21614e+06	7.20077e+06	0	1	1	2
1822	-2.86396e+06	7.2001e+06	0	0	0	0
1826	-3.95419e+06	7.19952e+06	0	0	0	0
1830	-2.22144e+06	7.20026e+06	0	0	0	0
1836	1.47668e+06	7.19997e+06	0	1	1	2
1837	-1.00771e+07	7.19917e+06	1	0	1	0
1838	-5.11951e+06	7.19917e+06	0	0	0	0
1841	-9.01687e+06	7.1993e+06	2	1	3	0
1842	-6.17972e+06	7.1993e+06	1	1	2	0
1845	-8.40431e+06	7.19945e+06	2	1	3	0
1846	-6.79228e+06	7.19945e+06	1	1	2	0
1850	-3.72411e+06	7.19812e+06	0	0	0	0
1856	1.73517e+06	7.19854e+06	0	0	0	1
1857	-9.84646e+06	7.19761e+06	1	0	1	0
1858	-5.35013e+06	7.19761e+06	0	0	0	0
1863	2.66048e+06	7.19851e+06	0	0	0	0
1866	-3.49675e+06	7.19623e+06	0	0	0	0
1870	-2.64383e+06	7.19647e+06	0	0	0	0
1875	1.99057e+06	7.19649e+06	0	0	0	0
1876	-9.61842e+06	7.19555e+06	1	0	1	0
1877	-5.57817e+06	7.19555e+06	0	0	0	0
1884	-8.79529e+06	7.19547e+06	2	1	3	0
1885	-6.4013e+06	7.19547e+06	1	1	2	0
1888	9.57067e+06	7.19593e+06	0	0	0	0
1889	9.9678e+06	7.19593e+06	0	0	0	0
1890	-7.79686e+06	7.19593e+06	2	1	3	0
1891	-7.39973e+06	7.19593e+06	1	1	2	0
1897	-2.01073e+06	7.19538e+06	0	0	0	0
1900	-8.19162e+06	7.19433e+06	2	1	3	0
1901	-7.00496e+06	7.19433e+06	1	1	2	0
1903	1.03626e+07	7.19433e+06	0	1	1	1
1905	-3.27277e+06	7.19386e+06	0	0	0	0
1912	-9.39364e+06	7.19299e+06	1	0	1	0
1913	-5.80295e+06	7.19299e+06	1	0	1	0
1918	2.2419e+06	7.19381e+06	0	0	0	0
1920	-2.42944e+06	7.19237e+06	0	0	0	0
1923	-8.57948e+06	7.19113e+06	2	1	3	0
1924	-6.61711e+06	7.19113e+06	1	1	2	0
1928	-3.05275e+06	7.19101e+06	0	0	0	0
1932	1.08547e+06	7.19073e+06	0	1	1	2
1933	-9.17274e+06	7.18993e+06	1	0	1	0
1934	-6.02385e+06	7.18993e+06	1	1	2	0
1941	-1.06433e+07	7.18947e+06	1	0	1	0
1942	-4.55332e+06	7.18947e+06	0	0	0	0
1948	1.33796e+06	7.19028e+06	0	1	1	2
1949	-1.08678e+07	7.18932e+06	1	0	1	0
1950	-4.3288e+06	7.18932e+06	0	0	0	0
1954	-4.7779e+06	7.18913e+06	0	0	0	0
1962	-1.80718e+06	7.19003e+06	0	0	0	0
1965	-1.10916e+07	7.18869e+06	1	0	1	0
1966	-4.10503e+06	7.18869e+06	0	0	0	0
1969	-7.59829e+06	7.18948e+06	1	1	2	0
1970	9.76924e+06	7.18948e+06	0	0	0	0
1971	-1.01948e+07	7.18829e+06	1	0	1	0
1972	-5.00184e+06	7.18829e+06	0	0	0	0
1978	1.58911e+06	7.18915e+06	0	0	0	1
1983	-7.98628e+06	7.18867e+06	2	1	3	0
1984	-7.21031e+06	7.18867e+06	1	1	2	0
1986	1.01572e+07	7.18867e+06	0	1	1	1
1988	-3.88268e+06	7.18757e+06	0	0	0	0
1992	-2.83723e+06	7.18768e+06	0	0	0	0
1995	-9.97213e+06	7.18697e+06	1	0	1	0
1996	-5.22445e+06	7.18697e+06	0	0	0	0
2000	-2.22116e+06	7.18779e+06	0	0	0	0
2006	1.83794e+06	7.18741e+06	0	0	0	0
2007	-8.9563e+06	7.18635e+06	2	1	3	0
2008	-6.24029e+06	7.18635e+06	1	1	2	0
2012	-3.6624e+06	7.18596e+06	0	0	0	0
2015	8.9977e+06	7.18626e+06	0	0	0	0
2017	-8.36983e+06	7.18626e+06	2	1	3	0
2018	-6.82676e+06	7.18626e+06	1	1	2	0
2023	-9.7515e+06	7.18514e+06	1	0	1	0
2024	-5.44509e+06	7.18514e+06	0	0	0	0
2029	2.08352e+06	7.18503e+06	0	1	1	2
2031	-3.44481e+06	7.18387e+06	0	0	0	0
2035	-2.62664e+06	7.18386e+06	0	0	0	0
2042	-9.53347e+06	7.18282e+06	1	0	1	0
2043	-5.66312e+06	7.18282e+06	1	0	1	0
2052	-8.74479e+06	7.18225e+06	2	1	3	0
2053	-6.4518e+06	7.18225e+06	1	1	2	0
2055	-2.01924e+06	7.18272e+06	0	0	0	0
2058	-7.78846e+06	7.18248e+06	2	1	3	0
2059	-7.40813e+06	7.18248e+06	1	1	2	0
2060	9.57907e+06	7.18248e+06	0	0	0	0
2061	9.9594e+06	7.18248e+06	0	0	0	0
2064	2.32501e+06	7.18203e+06	0	0	0	0
2066	-3.23046e+06	7.1813e+06	0	0	0	0
2073	-8.16668e+06	7.18086e+06	2	1	3	0
2074	-7.02991e+06	7.18086e+06	1	1	2	0
2076	1.03376e+07	7.18086e+06	0	1	1	1
2077	-9.31864e+06	7.17999e+06	1	0	1	0
2078	-5.87795e+06	7.17999e+06	1	1	2	0
2084	1.20778e+06	7.18009e+06	0	1	1	2
2086	-2.42136e+06	7.17956e+06	0	0	0	0
2092	1.45173e+06	7.17928e+06	0	1	1	2
2094	-3.01986e+06	7.17826e+06	0	0	0	0
2097	-1.07353e+07	7.1776e+06	1	0	1	0
2098	-4.4613e+06	7.1776e+06	0	0	0	0
2101	-1.05192e+07	7.17748e+06	1	0	1	0
2102	-4.67735e+06	7.17748e+06	0	0	0	0
2109	-1.0951e+07	7.17724e+06	1	0	1	0
2110	-4.24557e+06	7.17724e+06	0	0	0	0
2113	-8.53865e+06	7.17763e+06	2	1	3	0
2114	-6.65794e+06	7.17763e+06	1	1	2	0
2120	1.69402e+06	7.17783e+06	0	0	0	1
2121	-1.03035e+07	7.17686e+06	1	0	1	0
2122	-4.89313e+06	7.17686e+06	0	0	0	0
2125	-9.10754e+06	7.17665e+06	1	0	1	0
2126	-6.08905e+06	7.17665e+06	1	1	2	0
2129	-1.11658e+07	7.1764e+06	1	1	2	0
2130	-4.03078e+06	7.1764e+06	0	0	0	0
2138	-1.82385e+06	7.17717e+06	0	0	0	0
2141	-1.00886e+07	7.17576e+06	1	0	1	0
2142	-5.10801e+06	7.17576e+06	0	0	0	0
2150	-3.81752e+06	7.17507e+06	0	0	0	0
2156	1.93377e+06	7.17576e+06	0	0	0	0
2157	-7.59829e+06	7.17574e+06	1	1	2	0
2158	9.76924e+06	7.17574e+06	0	0	0	0
2159	-9.87518e+06	7.17416e+06	1	0	1	0
2160	-5.32141e+06	7.17416e+06	0	0	0	0
2164	-2.81347e+06	7.17473e+06	0	0	0	0
2167	-7.97027e+06	7.17493e+06	2	1	3	0
2170	1.01412e+07	7.17493e+06	3	2	4	3
2172	-2.22169e+06	7.17479e+06	0	0	0	0
2176	-3.60634e+06	7.17326e+06	0	0	0	0
2183	-8.90065e+06	7.1728e+06	1	0	1	0
2184	-6.29594e+06	7.1728e+06	1	1	2	0
2189	2.17019e+06	7.17306e+06	0	1	1	1
2190	-9.66385e+06	7.17207e+06	1	0	1	0
2191	-5.53274e+06	7.17207e+06	1	0	1	0
2194	-8.33822e+06	7.17249e+06	2	1	3	0
2195	-6.85837e+06	7.17249e+06	1	1	2	0
2199	-3.39779e+06	7.17098e+06	0	0	0	0
2203	-2.61166e+06	7.17072e+06	0	0	0	0
2207	-1.63511e+06	7.17115e+06	0	0	0	0
2215	-5.74147e+06	7.16948e+06	1	0	1	0
2216	7.91241e+06	7.16948e+06	0	0	0	0
2220	2.40254e+06	7.16974e+06	0	0	0	0
2225	-2.02786e+06	7.16954e+06	0	0	0	0
2228	-8.69839e+06	7.16844e+06	1	0	1	0
2229	-6.4982e+06	7.16844e+06	1	1	2	0
2230	8.66914e+06	7.16844e+06	1	0	0	1
2235	1.32239e+06	7.16891e+06	0	1	1	2
2241	-3.19234e+06	7.16821e+06	0	0	0	0
2244	-7.78077e+06	7.16845e+06	2	1	3	0
2245	-7.41582e+06	7.16845e+06	1	1	2	0
2247	9.95171e+06	7.16845e+06	3	2	4	3
2251	1.55821e+06	7.16777e+06	0	0	0	1
2252	-9.2495e+06	7.16638e+06	1	1	2	0
2253	-5.94709e+06	7.16638e+06	1	1	2	0
2256	-8.14379e+06	7.16682e+06	2	1	3	0
2257	-7.0528e+06	7.16682e+06	1	1	2	0
2259	1.03147e+07	7.16682e+06	3	2	4	3
2263	-2.41476e+06	7.16624e+06	0	0	0	0
2264	-1.06119e+07	7.16526e+06	1	0	1	0
2265	-4.58474e+06	7.16526e+06	0	0	0	0
2268	-1.08198e+07	7.16518e+06	1	0	1	0
2269	-4.37675e+06	7.16518e+06	0	0	0	0
2275	1.79212e+06	7.16601e+06	0	0	0	0
2277	-4.79271e+06	7.16487e+06	0	0	0	0
2284	-1.10273e+07	7.16461e+06	1	1	2	0
2285	-4.16931e+06	7.16461e+06	0	0	0	0
2289	-2.99043e+06	7.16497e+06	0	0	0	0
2292	-1.01964e+07	7.16398e+06	1	0	1	0
2293	-5.00015e+06	7.16398e+06	0	0	0	0
2296	-1.12337e+07	7.16356e+06	1	1	2	0
2297	-3.96294e+06	7.16356e+06	0	0	0	0
2300	-8.50112e+06	7.16355e+06	2	1	3	0
2301	-6.69547e+06	7.16355e+06	2	1	3	0
2302	8.86641e+06	7.16355e+06	1	0	0	1
2308	-9.99009e+06	7.16261e+06	1	0	1	0
2309	-5.2065e+06	7.16261e+06	0	0	0	0
2314	2.02337e+06	7.16361e+06	0	0	0	1
2315	-9.04743e+06	7.16278e+06	1	0	1	0
2316	-6.14915e+06	7.16278e+06	2	1	3	0
2320	-1.84002e+06	7.16381e+06	0	0	0	0
2327	-1.14384e+07	7.16203e+06	1	1	2	0
2328	-3.75815e+06	7.16203e+06	0	0	0	0
2332	-5.41124e+06	7.16075e+06	1	0	1	0
2336	-2.79246e+06	7.16125e+06	0	0	0	0
2339	-7.59829e+06	7.16143e+06	1	1	2	0
2340	9.76924e+06	7.16143e+06	3	2	4	3
2342	-2.22303e+06	7.16128e+06	0	0	0	0
2349	-1.16411e+07	7.16003e+06	1	1	2	0
2350	-3.55544e+06	7.16003e+06	0	0	0	0
2353	-7.95555e+06	7.1606e+06	2	1	3	0
2355	9.41198e+06	7.1606e+06	2	1	2	0
2356	1.01265e+07	7.1606e+06	3	2	4	3
2359	2.25123e+06	7.1606e+06	0	1	1	1
2363	-5.61389e+06	7.15839e+06	1	0	1	0
2364	-8.84935e+06	7.15866e+06	1	0	1	0
2365	-6.34724e+06	7.15866e+06	2	1	3	0
2366	8.51818e+06	7.15866e+06	1	1	1	1
2368	-8.30914e+06	7.15814e+06	2	1	3	0
2369	-6.88745e+06	7.15814e+06	2	1	3	0
2371	1.04801e+07	7.15814e+06	3	2	4	3
2373	-3.35527e+06	7.15755e+06	0	0	0	0
2381	-2.59874e+06	7.15706e+06	0	0	0	0
2387	1.42996e+06	7.15722e+06	0	1	1	2
2389	-1.65827e+06	7.1576e+06	0	0	0	0
2400	-9.38261e+06	7.15553e+06	1	1	2	0
2401	-5.81398e+06	7.15553e+06	1	1	2	0
2407	1.65807e+06	7.15577e+06	0	0	0	1
2409	-2.03667e+06	7.15584e+06	0	0	0	0
2419	-3.15806e+06	7.15459e+06	0	0	0	0
2420	-8.6556e+06	7.15403e+06	1	1	2	0
2421	-6.54099e+06	7.15403e+06	2	1	3	0
2422	8.71193e+06	7.15403e+06	1	1	1	1
2424	-7.77369e+06	7.15385e+06	1	1	2	0
2426	9.59384e+06	7.15385e+06	0	0	0	0
2427	9.94463e+06	7.15385e+06	3	2	4	3
2433	-4.49945e+06	7.15249e+06	0	0	0	0
2434	6.67039e+06	7.15249e+06	0	0	0	0
2436	-1.04966e+07	7.15231e+06	2	1	2	0
2437	-4.7e+06	7.15231e+06	0	0	0	0
2440	-1.08975e+07	7.1522e+06	1	1	2	0
2441	-4.29912e+06	7.1522e+06	0	0	0	0
2442	6.47006e+06	7.1522e+06	0	0	0	0
2444	-9.18553e+06	7.15217e+06	1	1	2	0
2445	-6.01106e+06	7.15217e+06	2	1	3	0
2449	-4.90028e+06	7.15164e+06	0	0	0	0
2453	-2.40958e+06	7.15239e+06	0	0	0	0
2460	-8.1227e+06	7.15219e+06	2	1	3	0
2461	-7.07389e+06	7.15219e+06	1	0	1	0
2462	9.24483e+06	7.15219e+06	3	2	4	3
2463	1.02936e+07	7.15219e+06	3	2	4	3
2464	-1.10971e+07	7.15142e+06	1	1	2	0
2465	-4.09947e+06	7.15142e+06	0	0	0	0
2469	-2.96419e+06	7.15116e+06	0	0	0	0
2471	1.44033e+07	7.15116e+06	0	0	0	0
2472	-1.00968e+07	7.15049e+06	1	0	1	0
2473	-5.09981e+06	7.15049e+06	0	0	0	0
2476	-1.12956e+07	7.15018e+06	1	1	2	0
2477	-3.90099e+06	7.15018e+06	0	0	0	0
2482	2.10735e+06	7.15097e+06	0	0	0	0
2488	-5.29811e+06	7.14885e+06	1	0	1	0
2496	-1.85581e+06	7.14993e+06	0	0	0	0
2499	-8.46649e+06	7.14888e+06	1	1	2	0
2500	-6.7301e+06	7.14888e+06	2	1	3	0
2502	1.06374e+07	7.14888e+06	3	2	4	3
2503	-1.14925e+07	7.14845e+06	1	1	2	0
2504	-3.70412e+06	7.14845e+06	0	0	0	0
2507	-8.99184e+06	7.14831e+06	1	1	2	0
2508	-6.20475e+06	7.14831e+06	2	1	3	0
2513	-9.70185e+06	7.14672e+06	2	0	1	0
2514	-5.49474e+06	7.14672e+06	1	0	1	0
2516	-2.77399e+06	7.14725e+06	0	0	0	0
2527	-2.22518e+06	7.14725e+06	0	0	0	0
2529	1.51424e+07	7.14725e+06	0	0	0	0
2530	-1.16873e+07	7.14625e+06	1	1	2	0
2531	-3.50929e+06	7.14625e+06	0	0	0	0
2536	-7.59829e+06	7.14654e+06	1	1	2	0
2537	9.76924e+06	7.14654e+06	3	2	4	3
2542	-7.94199e+06	7.1457e+06	1	1	2	0
2544	9.42554e+06	7.1457e+06	3	2	4	3
2545	1.01129e+07	7.1457e+06	3	2	4	3
2546	-9.50732e+06	7.1441e+06	3	0	2	0
2547	-5.68927e+06	7.1441e+06	1	1	2	0
2553	1.53112e+06	7.14504e+06	0	0	0	1
2554	-8.80189e+06	7.14393e+06	1	1	2	0
2555	-6.3947e+06	7.14393e+06	2	1	3	0
2556	8.56564e+06	7.14393e+06	1	1	1	1
2559	-3.31691e+06	7.14358e+06	0	0	0	0
2562	-8.2823e+06	7.1432e+06	1	1	2	0
2563	-6.91429e+06	7.1432e+06	2	1	3	0
2564	9.08523e+06	7.1432e+06	3	2	4	3
2565	1.04532e+07	7.1432e+06	3	2	4	3
2568	2.54321e+06	7.14366e+06	0	0	0	0
2573	1.75192e+06	7.14326e+06	0	0	0	1
2579	-2.58776e+06	7.14288e+06	0	0	0	0
2583	-1.68055e+06	7.14354e+06	0	0	0	0
2586	-9.3153e+06	7.14098e+06	2	1	2	0
2587	-5.88129e+06	7.14098e+06	2	1	3	0
2595	-2.04573e+06	7.14163e+06	0	0	0	0
2597	1.53218e+07	7.14163e+06	0	0	0	0
2598	1.42402e+07	7.14044e+06	0	1	1	1
2600	-3.12734e+06	7.14044e+06	0	0	0	0
2605	-1.05821e+07	7.13918e+06	2	1	2	0
2606	-4.61447e+06	7.13918e+06	0	0	0	0
2610	-4.42099e+06	7.13916e+06	0	0	0	0
2611	6.59193e+06	7.13916e+06	0	0	0	0
2613	-1.03887e+07	7.13872e+06	2	1	2	0
2614	-4.8079e+06	7.13872e+06	0	0	0	0
2617	-1.09687e+07	7.13866e+06	1	1	2	0
2618	-4.22789e+06	7.13866e+06	0	0	0	0
2619	6.39883e+06	7.13866e+06	0	0	0	0
2621	-8.616e+06	7.13904e+06	1	1	2	0
2622	-6.58059e+06	7.13904e+06	2	1	3	0
2624	1.07869e+07	7.13904e+06	3	2	4	3
2626	-5.00084e+06	7.13779e+06	0	0	0	0
2633	-1.1161e+07	7.13769e+06	1	1	2	0
2634	-4.03559e+06	7.13769e+06	0	0	0	0
2635	6.20653e+06	7.13769e+06	0	0	0	0
2637	-7.76715e+06	7.13866e+06	1	1	2	0
2638	-7.42944e+06	7.13866e+06	1	1	2	0
2639	9.60038e+06	7.13866e+06	3	2	4	3
2640	9.93809e+06	7.13866e+06	3	2	4	3
2641	-9.12616e+06	7.13737e+06	1	1	2	0
2642	-6.07043e+06	7.13737e+06	2	1	3	0
2646	-2.40574e+06	7.13803e+06	0	0	0	0
2652	-1.00037e+07	7.13637e+06	1	0	1	0
2653	-5.19287e+06	7.13637e+06	1	0	1	0
2657	-2.94091e+06	7.13682e+06	0	0	0	0
2659	1.44266e+07	7.13682e+06	0	0	0	1
2660	-8.10322e+06	7.13698e+06	1	1	2	0
2661	-7.09337e+06	7.13698e+06	1	0	1	0
2662	9.26431e+06	7.13698e+06	3	2	4	3
2663	1.02742e+07	7.13698e+06	3	2	4	3
2664	-1.13521e+07	7.13624e+06	1	1	2	0
2665	-3.8445e+06	7.13624e+06	0	0	0	0
2666	6.01545e+06	7.13624e+06	0	0	0	0
2667	1.3523e+07	7.13624e+06	0	0	0	0
2676	-9.813e+06	7.13447e+06	2	0	1	0
2677	-5.38359e+06	7.13447e+06	1	0	1	0
2680	-1.15416e+07	7.13433e+06	1	1	2	0
2681	-3.65503e+06	7.13433e+06	0	0	0	0
2682	5.82597e+06	7.13433e+06	0	0	0	0
2683	1.37125e+07	7.13433e+06	1	1	1	1
2685	-1.87135e+06	7.13554e+06	0	0	0	0
2692	-8.43444e+06	7.13363e+06	1	1	2	0
2693	-6.76215e+06	7.13363e+06	2	1	3	0
2695	1.06054e+07	7.13363e+06	3	2	4	3
2696	-8.94024e+06	7.13324e+06	1	1	2	0
2697	-6.25635e+06	7.13324e+06	2	1	3	0
2702	2.39874e+06	7.13416e+06	0	0	0	0
2712	-9.62399e+06	7.13208e+06	4	1	3	1
2713	-5.5726e+06	7.13208e+06	1	1	2	0
2717	-2.75791e+06	7.13274e+06	0	0	0	0
2720	-1.1729e+07	7.13194e+06	1	1	2	0
2721	-3.46755e+06	7.13194e+06	0	0	0	0
2725	-2.22814e+06	7.13271e+06	0	0	0	0
2731	1.62642e+06	7.13236e+06	0	0	0	1
2732	9.76924e+06	7.13107e+06	3	2	4	3
2733	-7.59829e+06	7.13107e+06	1	1	2	0
2734	-7.92944e+06	7.13022e+06	1	1	2	0
2736	9.43809e+06	7.13022e+06	3	2	4	3
2737	1.01004e+07	7.13022e+06	3	2	4	3
2742	-9.43707e+06	7.1292e+06	4	1	3	1
2743	-5.75951e+06	7.1292e+06	1	1	2	0
2744	7.93046e+06	7.1292e+06	2	1	4	3
2746	-1.19142e+07	7.12908e+06	1	1	2	0
2747	-3.28241e+06	7.12908e+06	0	0	0	0
2754	-8.75785e+06	7.12861e+06	2	1	2	0
2755	-6.43874e+06	7.12861e+06	2	1	3	0
2757	1.09288e+07	7.12861e+06	3	2	4	3
2763	-1.70212e+06	7.12898e+06	0	0	0	0
2767	-2.57862e+06	7.12818e+06	0	0	0	0
2769	1.47889e+07	7.12818e+06	0	0	0	1
2770	-8.25743e+06	7.12768e+06	1	1	2	0
2772	9.1101e+06	7.12768e+06	3	2	4	3
2773	1.04284e+07	7.12768e+06	3	2	4	3
2781	-9.25259e+06	7.12583e+06	1	1	2	0
2782	-5.944e+06	7.12583e+06	2	1	3	0
2786	-2.0551e+06	7.12692e+06	0	0	0	0
2789	-1.06609e+07	7.12549e+06	2	1	2	0
2790	-4.53568e+06	7.12549e+06	0	0	0	0
2793	-1.0474e+07	7.12524e+06	3	2	3	1
2794	-4.72256e+06	7.12524e+06	0	0	0	0
2797	-1.08477e+07	7.12526e+06	2	1	2	0
2798	-4.34892e+06	7.12526e+06	0	0	0	0
2799	6.51986e+06	7.12526e+06	0	0	0	0
2802	-3.09993e+06	7.12576e+06	0	0	0	0
2805	-1.02874e+07	7.12451e+06	3	2	3	1
2806	-4.90916e+06	7.12451e+06	0	0	0	0
2809	-1.10339e+07	7.12457e+06	1	1	2	0
2810	-4.16265e+06	7.12457e+06	0	0	0	0
2811	6.33359e+06	7.12457e+06	0	0	0	0
2812	1.32049e+07	7.12457e+06	3	2	3	2
2817	-1.01015e+07	7.12331e+06	3	2	3	1
2818	-5.09512e+06	7.12331e+06	1	0	1	0
2821	-1.12193e+07	7.1234e+06	1	1	2	0
2822	-3.97726e+06	7.1234e+06	0	0	0	0
2823	6.1482e+06	7.1234e+06	0	0	0	0
2824	1.33903e+07	7.1234e+06	3	2	3	2
2826	-8.57925e+06	7.12346e+06	2	1	2	0
2827	-6.61734e+06	7.12346e+06	2	1	3	0
2830	8.78829e+06	7.12346e+06	0	0	0	0
2831	1.07502e+07	7.12346e+06	3	2	4	3
2833	-2.40323e+06	7.12316e+06	0	0	0	0
2836	-7.7611e+06	7.12291e+06	1	1	2	0
2838	9.60643e+06	7.12291e+06	3	2	4	3
2839	9.93204e+06	7.12291e+06	3	2	4	3
2840	-9.07087e+06	7.12195e+06	1	1	2	0
2841	-6.12572e+06	7.12195e+06	2	1	3	0
2844	-9.91654e+06	7.12163e+06	3	1	2	1
2845	-5.28005e+06	7.12163e+06	1	0	1	0
2848	-1.14035e+07	7.12177e+06	1	1	2	0
2849	-3.79311e+06	7.12177e+06	0	0	0	0
2850	5.96405e+06	7.12177e+06	0	0	0	0
2851	1.35744e+07	7.12177e+06	3	2	3	2
2855	-2.92041e+06	7.12197e+06	0	0	0	0
2862	-8.08517e+06	7.1212e+06	3	1	3	0
2864	9.28236e+06	7.1212e+06	3	2	4	3
2865	1.02561e+07	7.1212e+06	3	2	5	4
2878	-9.73299e+06	7.11947e+06	4	1	3	1
2879	-5.4636e+06	7.11947e+06	1	1	2	0
2882	-1.1586e+07	7.11967e+06	1	1	2	0
2883	-3.61056e+06	7.11967e+06	0	0	0	0
2884	5.7815e+06	7.11967e+06	0	0	0	0
2885	1.3757e+07	7.11967e+06	3	2	3	2
2887	-1.88675e+06	7.12065e+06	0	0	0	0
2902	-8.89219e+06	7.11758e+06	1	1	2	0
2903	-6.3044e+06	7.11758e+06	2	1	3	0
2904	8.47534e+06	7.11758e+06	0	0	0	0
2905	1.10631e+07	7.11758e+06	3	2	4	3
2906	-8.40467e+06	7.11779e+06	2	1	2	0
2908	8.96286e+06	7.11779e+06	3	2	4	3
2909	1.05756e+07	7.11779e+06	3	2	5	4
2911	-2.7441e+06	7.1177e+06	0	0	0	0
2914	1.39376e+07	7.1171e+06	3	2	3	2
2915	-1.17667e+07	7.1171e+06	1	1	2	0
2916	-3.42992e+06	7.1171e+06	0	0	0	0
2917	5.60087e+06	7.1171e+06	0	0	0	0
2918	-9.55117e+06	7.11682e+06	4	1	3	1
2919	-5.64542e+06	7.11682e+06	1	1	2	0
2920	7.81636e+06	7.11682e+06	2	1	4	2
2923	-2.23193e+06	7.11766e+06	0	0	0	0
2934	-7.59829e+06	7.11503e+06	1	1	2	0
2935	9.76924e+06	7.11503e+06	3	2	4	3
2937	-3.25153e+06	7.11406e+06	0	0	0	0
2939	1.4116e+07	7.11406e+06	3	2	3	2
2940	-9.3714e+06	7.11368e+06	4	1	3	1
2941	-5.82519e+06	7.11368e+06	1	1	2	0
2942	7.99613e+06	7.11368e+06	3	2	5	4
2944	9.44972e+06	7.11416e+06	3	2	4	3
2945	1.00887e+07	7.11416e+06	3	2	5	4
2946	-7.91781e+06	7.11416e+06	3	1	3	0
2959	-8.71683e+06	7.11269e+06	2	1	2	0
2960	-6.47976e+06	7.11269e+06	2	1	3	0
2961	8.6507e+06	7.11269e+06	3	2	4	3
2962	1.08878e+07	7.11269e+06	3	2	4	3
2964	-2.57124e+06	7.11297e+06	0	0	0	0
2966	1.47963e+07	7.11297e+06	0	0	0	0
2971	-1.07333e+07	7.11123e+06	3	2	3	1
2972	-4.46324e+06	7.11123e+06	0	0	0	0
2975	-1.05527e+07	7.11118e+06	3	2	3	1
2976	-4.64387e+06	7.11118e+06	0	0	0	0
2979	-1.09137e+07	7.11081e+06	3	2	3	1
2980	-4.28285e+06	7.11081e+06	0	0	0	0
2982	1.30847e+07	7.11081e+06	3	2	3	2
2983	-8.23433e+06	7.11158e+06	3	1	3	0
2985	9.1332e+06	7.11158e+06	3	2	4	3
2986	1.04053e+07	7.11158e+06	3	2	5	4
2987	-1.03722e+07	7.11066e+06	3	2	3	1
2988	-4.82441e+06	7.11066e+06	0	0	0	0
2992	-2.06485e+06	7.1117e+06	0	0	0	0
2996	-3.07565e+06	7.11056e+06	0	0	0	0
2998	1.42919e+07	7.11056e+06	3	2	3	2
2999	-1.10935e+07	7.10993e+06	1	1	2	0
3000	-4.10304e+06	7.10993e+06	0	0	0	0
3001	6.27398e+06	7.10993e+06	0	0	0	0
3002	1.32645e+07	7.10993e+06	3	2	3	2
3003	-9.19398e+06	7.11005e+06	2	1	3	0
3007	-1.01921e+07	7.10966e+06	3	2	3	1
3008	-5.00449e+06	7.10966e+06	0	0	0	0
3022	-1.12724e+07	7.10858e+06	1	1	2	0
3023	-3.92415e+06	7.10858e+06	0	0	0	0
3024	6.09509e+06	7.10858e+06	0	0	0	0
3025	1.34434e+07	7.10858e+06	3	2	3	2
3026	-1.00128e+07	7.1082e+06	4	1	3	1
3027	-5.18379e+06	7.1082e+06	1	0	1	0
3035	-2.40201e+06	7.10778e+06	0	0	0	0
3038	-8.54501e+06	7.10728e+06	2	1	2	0
3040	8.82252e+06	7.10728e+06	3	2	4	3
3041	1.0716e+07	7.10728e+06	3	2	4	3
3042	-1.14501e+07	7.10676e+06	1	1	2	0
3043	-3.74651e+06	7.10676e+06	0	0	0	0
3044	5.91745e+06	7.10676e+06	0	0	0	0
3045	1.3621e+07	7.10676e+06	3	2	3	2
3050	-9.8346e+06	7.10625e+06	4	1	3	1
3051	-5.36199e+06	7.10625e+06	1	1	2	0
3055	-2.90255e+06	7.10659e+06	0	0	0	0
3057	1.4465e+07	7.10659e+06	3	2	3	2
3058	-9.0192e+06	7.10593e+06	2	0	2	0
3060	8.34833e+06	7.10593e+06	0	0	0	0
3062	-7.75548e+06	7.10657e+06	2	1	3	0
3064	9.61205e+06	7.10657e+06	3	2	5	4
3065	9.92642e+06	7.10657e+06	3	3	5	5
3083	-3.57042e+06	7.10448e+06	0	0	0	0
3084	5.74136e+06	7.10448e+06	0	0	0	0
3085	1.37971e+07	7.10448e+06	3	2	3	2
3086	-8.06838e+06	7.10483e+06	3	1	3	0
3088	9.29915e+06	7.10483e+06	3	2	4	3
3089	1.02393e+07	7.10483e+06	3	2	5	5
3092	-9.65784e+06	7.10383e+06	4	1	3	1
3093	-5.53875e+06	7.10383e+06	1	1	2	0
3095	-1.9021e+06	7.10527e+06	0	0	0	0
3106	-3.39618e+06	7.10173e+06	0	0	0	0
3107	5.56713e+06	7.10173e+06	0	0	0	1
3108	1.39713e+07	7.10173e+06	3	2	3	2
3110	-2.73246e+06	7.10216e+06	0	0	0	0
3113	-8.8473e+06	7.1013e+06	1	1	2	0
3115	8.52023e+06	7.1013e+06	3	2	4	3
3116	1.10182e+07	7.1013e+06	3	2	4	3
3118	-2.23656e+06	7.10211e+06	0	0	0	0
3121	-9.4828e+06	7.10093e+06	4	1	3	1
3122	-5.71379e+06	7.10093e+06	1	1	2	0
3123	7.88473e+06	7.10093e+06	3	2	5	4
3125	-8.37694e+06	7.10136e+06	3	1	3	0
3127	8.99059e+06	7.10136e+06	3	2	4	3
3128	1.05479e+07	7.10136e+06	3	2	5	5
3137	-3.22407e+06	7.09852e+06	0	0	0	0
3138	5.39502e+06	7.09852e+06	0	0	0	1
3139	1.41435e+07	7.09852e+06	3	2	3	2
3140	-9.30976e+06	7.09754e+06	4	1	3	1
3148	-7.59829e+06	7.09841e+06	2	1	3	0
3149	9.76924e+06	7.09841e+06	3	4	6	5
3151	-1.74376e+06	7.09837e+06	0	0	0	0
3154	-1.06251e+07	7.09655e+06	3	2	3	1
3155	-4.57153e+06	7.09655e+06	0	0	0	0
3158	-1.07998e+07	7.09641e+06	3	2	3	1
3159	-4.39684e+06	7.09641e+06	0	0	0	0
3162	9.46055e+06	7.09753e+06	3	3	5	5
3163	1.00779e+07	7.09753e+06	3	4	6	5
3164	-7.90698e+06	7.09753e+06	2	1	3	0
3166	-1.04503e+07	7.09622e+06	3	2	3	1
3167	-4.74625e+06	7.09622e+06	0	0	0	0
3171	-2.56557e+06	7.09726e+06	0	0	0	0
3180	-1.09741e+07	7.0958e+06	3	2	3	1
3181	-4.22248e+06	7.0958e+06	0	0	0	0
3183	1.31451e+07	7.0958e+06	3	2	3	2
3184	-8.67851e+06	7.09617e+06	2	1	2	0
3186	8.68902e+06	7.09617e+06	3	2	4	3
3187	1.08494e+07	7.09617e+06	3	2	4	3
3192	-1.02759e+07	7.09543e+06	3	2	3	1
3193	-4.92069e+06	7.09543e+06	0	0	0	0
3196	-1.11478e+07	7.09474e+06	2	2	3	1
3197	-4.04876e+06	7.09474e+06	0	0	0	0
3199	1.33188e+07	7.09474e+06	3	2	3	2
3201	-2.07504e+06	7.09598e+06	0	0	0	0
3208	-1.01021e+07	7.09417e+06	2	1	2	1
3209	-5.09454e+06	7.09417e+06	1	0	1	0
3213	-3.05434e+06	7.09485e+06	0	0	0	0
3215	1.43132e+07	7.09485e+06	3	2	3	2
3216	-8.2128e+06	7.09489e+06	3	1	3	0
3218	9.15473e+06	7.09489e+06	3	2	4	3
3219	1.03837e+07	7.09489e+06	3	2	5	5
3228	-9.139e+06	7.09366e+06	2	0	2	0
3230	8.22853e+06	7.09366e+06	0	0	0	0
3232	-1.13206e+07	7.09321e+06	1	1	2	0
3233	-3.87599e+06	7.09321e+06	0	0	0	0
3235	1.34915e+07	7.09321e+06	3	2	3	2
3240	-9.92909e+06	7.09244e+06	2	1	2	1
3241	-5.2675e+06	7.09244e+06	1	1	2	0
3245	-3.70444e+06	7.09121e+06	0	0	0	0
3246	5.87538e+06	7.09121e+06	0	0	0	0
3247	1.36631e+07	7.09121e+06	3	2	3	2
3249	-2.40206e+06	7.0919e+06	0	0	0	0
3252	-9.75731e+06	7.09024e+06	4	1	3	1
3253	-5.43928e+06	7.09024e+06	1	1	2	0
3261	-2.88722e+06	7.09071e+06	0	0	0	0
3263	1.44803e+07	7.09071e+06	3	2	3	2
3264	-8.51302e+06	7.09051e+06	2	1	2	0
3266	8.85451e+06	7.09051e+06	3	2	4	3
3267	1.0684e+07	7.09051e+06	3	2	4	4
3273	-1.58985e+06	7.091e+06	0	0	0	0
3277	8.39679e+06	7.08929e+06	3	2	5	4
3279	-8.97074e+06	7.08929e+06	2	1	3	0
3285	-3.5344e+06	7.08876e+06	0	0	0	0
3286	5.70535e+06	7.08876e+06	0	0	0	0
3287	1.38331e+07	7.08876e+06	3	2	3	2
3288	-7.75025e+06	7.08967e+06	2	1	3	0
3290	9.61728e+06	7.08967e+06	3	4	6	5
3291	9.92119e+06	7.08967e+06	3	4	6	5
3293	-1.91752e+06	7.08939e+06	0	0	0	0
3296	-9.58698e+06	7.08756e+06	4	1	3	1
3297	-5.60961e+06	7.08756e+06	1	1	2	0
3307	-8.05273e+06	7.08789e+06	2	1	3	0
3309	9.3148e+06	7.08789e+06	3	3	5	5
3310	1.02237e+07	7.08789e+06	3	4	6	5
3312	-3.36614e+06	7.08584e+06	0	0	0	0
3313	5.53708e+06	7.08584e+06	0	0	0	1
3314	1.40014e+07	7.08584e+06	1	1	1	1
3316	-2.7229e+06	7.08611e+06	0	0	0	0
3321	-2.24208e+06	7.08607e+06	0	0	0	0
3323	-9.41836e+06	7.0844e+06	4	1	3	1
3325	7.94918e+06	7.0844e+06	2	1	2	1
3327	-8.80519e+06	7.08442e+06	1	1	2	0
3329	8.56234e+06	7.08442e+06	3	2	5	4
3335	-8.35103e+06	7.08434e+06	3	1	3	0
3337	9.0165e+06	7.08434e+06	3	2	4	4
3338	1.0522e+07	7.08434e+06	3	2	5	5
3347	-3.19989e+06	7.08247e+06	0	0	0	0
3348	5.37083e+06	7.08247e+06	0	0	0	0
3349	1.41676e+07	7.08247e+06	3	2	3	2
3354	-1.06913e+07	7.08135e+06	3	2	3	1
3355	-4.50527e+06	7.08135e+06	0	0	0	0
3358	-1.05221e+07	7.08122e+06	3	2	3	1
3359	-4.67444e+06	7.08122e+06	0	0	0	0
3362	-1.08604e+07	7.08103e+06	3	2	3	1
3363	-4.33621e+06	7.08103e+06	0	0	0	0
3370	-1.03531e+07	7.08062e+06	3	2	3	1
3371	-4.84346e+06	7.08062e+06	0	0	0	0
3374	-9.25169e+06	7.08077e+06	3	1	3	1
3376	8.11584e+06	7.08077e+06	0	0	0	0
3379	-1.76409e+06	7.08233e+06	0	0	0	0
3390	-1.1029e+07	7.08025e+06	3	2	3	1
3391	-4.16756e+06	7.08025e+06	0	0	0	0
3395	-2.56158e+06	7.08105e+06	0	0	0	0
3398	-7.59829e+06	7.08123e+06	2	1	3	0
3399	9.76924e+06	7.08123e+06	3	4	6	5
3401	-5.01205e+06	7.07955e+06	1	0	1	0
3404	-7.89688e+06	7.08033e+06	2	1	3	0
3406	9.47065e+06	7.08033e+06	3	4	6	5
3407	1.00678e+07	7.08033e+06	3	4	6	5
3409	-3.99958e+06	7.079e+06	0	0	0	0
3411	1.3368e+07	7.079e+06	3	2	3	2
3416	-8.64257e+06	7.07904e+06	1	1	2	0
3418	8.72496e+06	7.07904e+06	3	2	4	3
3419	1.08135e+07	7.07904e+06	5	4	5	6
3421	-2.08573e+06	7.07978e+06	0	0	0	0
3425	-5.17993e+06	7.07803e+06	1	1	2	0
3431	1.76679e+06	7.07947e+06	0	0	0	0
3433	-3.03588e+06	7.07863e+06	0	0	0	0
3435	1.43316e+07	7.07863e+06	3	2	3	2
3440	-3.83254e+06	7.0773e+06	0	0	0	0
3442	1.3535e+07	7.0773e+06	3	2	3	2
3444	-8.19267e+06	7.07763e+06	2	1	3	0
3446	9.17486e+06	7.07763e+06	3	3	5	5
3447	1.03636e+07	7.07763e+06	3	4	6	5
3448	-9.0872e+06	7.07664e+06	2	0	2	0
3450	8.28033e+06	7.07664e+06	3	2	5	4
3453	-5.34683e+06	7.07603e+06	2	2	2	1
3460	-3.66671e+06	7.07514e+06	0	0	0	0
3461	5.83765e+06	7.07514e+06	0	0	0	0
3462	1.37008e+07	7.07514e+06	3	2	3	2
3465	-2.40341e+06	7.07553e+06	0	0	0	0
3473	-5.51251e+06	7.07357e+06	2	2	2	1
3474	7.68346e+06	7.07357e+06	3	2	5	4
3477	-2.87432e+06	7.07433e+06	0	0	0	0
3488	-8.48303e+06	7.07314e+06	1	1	2	0
3490	8.8845e+06	7.07314e+06	3	2	4	4
3491	1.0654e+07	7.07314e+06	4	3	4	5
3492	-1.16943e+07	7.07252e+06	2	2	3	1
3493	-3.50233e+06	7.07252e+06	0	0	0	0
3494	5.67327e+06	7.07252e+06	0	0	0	0
3501	8.44244e+06	7.07203e+06	3	2	5	4
3504	-1.9331e+06	7.07303e+06	0	0	0	0
3511	9.62217e+06	7.07219e+06	4	5	6	6
3512	9.9163e+06	7.07219e+06	3	4	6	5
3513	-7.74536e+06	7.07219e+06	2	1	3	0
3515	-9.51985e+06	7.07064e+06	2	1	2	1
3521	-8.0381e+06	7.07037e+06	2	1	3	0
3523	9.32943e+06	7.07037e+06	4	5	6	6
3524	1.0209e+07	7.07037e+06	4	5	6	6
3525	-1.18569e+07	7.06944e+06	2	2	3	1
3526	-3.33964e+06	7.06944e+06	0	0	0	0
3527	5.51058e+06	7.06944e+06	0	0	0	0
3534	-2.71539e+06	7.06957e+06	0	0	0	0
3538	-2.24851e+06	7.06955e+06	0	0	0	0
3552	-9.35732e+06	7.06723e+06	2	1	2	1
3554	8.01021e+06	7.06723e+06	3	2	5	5
3556	-8.76554e+06	7.06691e+06	1	1	2	0
3558	8.60199e+06	7.06691e+06	3	2	5	4
3559	1.09365e+07	7.06691e+06	5	4	5	6
3560	-8.32673e+06	7.06672e+06	1	1	2	0
3562	9.0408e+06	7.06672e+06	4	4	5	6
3563	1.04977e+07	7.06672e+06	4	3	4	5
3565	-4.60878e+06	7.06564e+06	0	0	0	0
3572	-1.07517e+07	7.0656e+06	3	2	3	1
3573	-4.44488e+06	7.0656e+06	0	0	0	0
3577	-4.77263e+06	7.06522e+06	0	0	0	0
3580	-1.20177e+07	7.0659e+06	2	2	3	1
3581	-3.17886e+06	7.0659e+06	0	0	0	0
3582	5.3498e+06	7.0659e+06	0	0	0	0
3584	-1.09154e+07	7.0651e+06	3	2	3	1
3585	-4.28116e+06	7.0651e+06	0	0	0	0
3587	1.30864e+07	7.0651e+06	3	2	3	2
3593	-4.93616e+06	7.06434e+06	1	0	1	0
3597	-4.11788e+06	7.06415e+06	0	0	0	0
3605	-1.78425e+06	7.06581e+06	0	0	0	0
3609	-2.55925e+06	7.06436e+06	0	0	0	0
3615	1.8448e+06	7.06467e+06	0	0	0	0
3616	-9.19669e+06	7.06334e+06	2	2	3	1
3618	8.17084e+06	7.06334e+06	3	2	5	5
3621	-5.09913e+06	7.06301e+06	2	2	2	1
3628	-1.12413e+07	7.06274e+06	2	2	3	1
3629	-3.95529e+06	7.06274e+06	0	0	0	0
3633	9.76924e+06	7.06347e+06	4	5	6	6
3639	-2.09698e+06	7.0631e+06	0	0	0	0
3643	-5.26129e+06	7.06121e+06	2	2	2	1
3646	-7.88743e+06	7.06255e+06	2	1	3	0
3648	9.4801e+06	7.06255e+06	4	5	6	6
3649	1.00584e+07	7.06255e+06	4	5	6	6
3651	-3.02019e+06	7.06191e+06	0	0	0	0
3654	-8.60873e+06	7.0613e+06	0	0	0	0
3656	8.7588e+06	7.0613e+06	3	2	5	5
3657	1.07797e+07	7.0613e+06	5	5	5	6
3658	-1.14029e+07	7.06087e+06	2	2	3	1
3659	-3.79364e+06	7.06087e+06	0	0	0	0
3661	1.35739e+07	7.06087e+06	3	3	4	2
3666	-5.42242e+06	7.05895e+06	2	2	2	1
3668	1.19451e+07	7.05895e+06	3	3	5	4
3671	9.19372e+06	7.05977e+06	4	5	6	6
3672	1.03447e+07	7.05977e+06	5	5	6	7
3673	-9.03815e+06	7.05898e+06	2	2	3	1
3675	8.32938e+06	7.05898e+06	3	2	5	5
3676	1.12091e+07	7.05898e+06	5	4	5	6
3677	-1.15634e+07	7.05855e+06	2	2	3	1
3678	-3.63316e+06	7.05855e+06	0	0	0	0
3680	1.37344e+07	7.05855e+06	3	3	4	2
3686	-2.40605e+06	7.05868e+06	0	0	0	0
3690	-2.86381e+06	7.05746e+06	0	0	0	0
3696	-9.61431e+06	7.05623e+06	3	2	4	1
3697	-5.58228e+06	7.05623e+06	2	2	2	1
3708	-1.17225e+07	7.05577e+06	2	2	3	1
3709	-3.47406e+06	7.05577e+06	0	0	0	0
3710	5.64501e+06	7.05577e+06	0	0	0	0
3720	-8.45479e+06	7.05517e+06	2	2	3	1
3722	8.91274e+06	7.05517e+06	4	4	5	6
3723	1.06257e+07	7.05517e+06	5	5	5	6
3725	-1.94892e+06	7.05619e+06	0	0	0	0
3732	-8.88187e+06	7.05412e+06	2	2	3	1
3734	8.48566e+06	7.05412e+06	3	2	5	5
3736	-9.45591e+06	7.05304e+06	3	2	4	1
3738	7.91162e+06	7.05304e+06	4	3	5	6
3739	1.16269e+07	7.05304e+06	0	0	0	0
3744	-7.74079e+06	7.05415e+06	3	1	3	0
3746	9.62674e+06	7.05415e+06	4	5	6	6
3747	9.91173e+06	7.05415e+06	4	5	6	6
3748	-1.188e+07	7.05254e+06	3	2	3	1
3749	-3.31658e+06	7.05254e+06	0	0	0	0
3750	5.48752e+06	7.05254e+06	0	0	0	0
3761	-2.70989e+06	7.05255e+06	0	0	0	0
3764	-8.02438e+06	7.05226e+06	2	1	3	0
3766	9.34315e+06	7.05226e+06	4	5	6	6
3767	1.01953e+07	7.05226e+06	4	5	6	6
3769	-2.25589e+06	7.05254e+06	0	0	0	0
3777	-4.54913e+06	7.04949e+06	0	0	0	0
3781	-4.70806e+06	7.04924e+06	0	0	0	0
3784	-9.29918e+06	7.04939e+06	3	2	4	1
3786	8.06835e+06	7.04939e+06	4	3	5	6
3789	-4.39021e+06	7.04928e+06	0	0	0	0
3792	-1.03298e+07	7.04854e+06	2	2	3	1
3793	-4.86677e+06	7.04854e+06	2	1	1	1
3797	-4.23152e+06	7.04862e+06	0	0	0	0
3799	1.3136e+07	7.04862e+06	3	2	3	2
3800	-8.72801e+06	7.04878e+06	2	2	3	1
3802	8.63952e+06	7.04878e+06	4	3	5	6
3803	1.0899e+07	7.04878e+06	5	5	5	6
3804	-1.20357e+07	7.04885e+06	3	2	3	1
3805	-3.16089e+06	7.04885e+06	0	0	0	0
3806	5.33183e+06	7.04885e+06	0	0	0	0
3816	-8.30386e+06	7.04851e+06	2	2	3	1
3818	9.06367e+06	7.04851e+06	4	5	6	6
3819	1.04748e+07	7.04851e+06	5	5	5	6
3820	-1.01716e+07	7.04739e+06	2	2	3	1
3821	-5.02502e+06	7.04739e+06	2	2	2	1
3823	1.23425e+07	7.04739e+06	5	5	5	6
3826	-1.11233e+07	7.04751e+06	2	2	3	1
3827	-4.0733e+06	7.04751e+06	0	0	0	0
3841	-2.55858e+06	7.04718e+06	0	0	0	0
3844	-1.0014e+07	7.04578e+06	2	2	3	1
3845	-5.1826e+06	7.04578e+06	2	2	2	1
3846	7.35354e+06	7.04578e+06	5	3	5	7
3847	1.21849e+07	7.04578e+06	5	5	5	6
3848	-1.12808e+07	7.04594e+06	2	2	3	1
3849	-3.91578e+06	7.04594e+06	0	0	0	0
3856	-9.1443e+06	7.04526e+06	2	2	3	1
3858	8.22323e+06	7.04526e+06	4	3	5	6
3859	1.13152e+07	7.04526e+06	5	5	5	6
3864	-2.10888e+06	7.04594e+06	0	0	0	0
3868	-3.00719e+06	7.04471e+06	0	0	0	0
3869	5.17813e+06	7.04471e+06	1	1	1	2
3871	-9.8573e+06	7.04371e+06	2	2	3	1
3872	-5.33929e+06	7.04371e+06	2	2	2	1
3874	1.20282e+07	7.04371e+06	4	3	5	5
3875	-1.14374e+07	7.04392e+06	2	2	3	1
3876	-3.75916e+06	7.04392e+06	0	0	0	0
3878	1.36084e+07	7.04392e+06	3	3	4	2
3879	-7.59829e+06	7.04515e+06	3	1	3	0
3880	9.76924e+06	7.04515e+06	4	5	6	6
3881	-7.87857e+06	7.04419e+06	3	1	3	0
3883	9.48896e+06	7.04419e+06	5	5	6	7
3884	1.00495e+07	7.04419e+06	4	5	6	6
3885	8.79082e+06	7.04293e+06	4	3	5	6
3886	1.07477e+07	7.04293e+06	5	5	5	6
3887	-8.57671e+06	7.04293e+06	2	2	3	1
3889	-9.7017e+06	7.04119e+06	2	2	3	1
3890	-5.49489e+06	7.04119e+06	2	2	2	1
3891	7.66583e+06	7.04119e+06	4	3	4	5
3892	1.18726e+07	7.04119e+06	4	3	5	5
3899	-1.15929e+07	7.04145e+06	3	2	3	1
3900	-3.60367e+06	7.04145e+06	0	0	0	0
3902	1.37639e+07	7.04145e+06	3	3	4	2
3907	-8.99142e+06	7.04065e+06	2	2	3	1
3909	8.37611e+06	7.04065e+06	4	3	5	6
3910	1.11624e+07	7.04065e+06	5	5	5	6
3914	-8.15606e+06	7.04132e+06	3	2	4	1
3916	9.21147e+06	7.04132e+06	4	5	6	6
3917	1.0327e+07	7.04132e+06	5	5	6	7
3919	-2.41001e+06	7.04135e+06	0	0	0	0
3927	-2.85564e+06	7.04011e+06	0	0	0	0
3938	-9.54739e+06	7.0382e+06	3	2	4	1
3940	7.82014e+06	7.0382e+06	4	3	5	6
3942	-1.17471e+07	7.03853e+06	3	2	3	1
3943	-3.44951e+06	7.03853e+06	0	0	0	0
3944	5.62045e+06	7.03853e+06	0	0	0	0
3945	1.3918e+07	7.03853e+06	3	3	4	2
3955	-1.96508e+06	7.03888e+06	0	0	0	0
3958	-8.42808e+06	7.03657e+06	2	2	3	1
3960	8.93945e+06	7.03657e+06	4	5	6	6
3961	1.0599e+07	7.03657e+06	5	5	5	6
3966	-8.84069e+06	7.03557e+06	2	2	3	1
3968	8.52684e+06	7.03557e+06	4	3	5	6
3969	1.10116e+07	7.03557e+06	5	5	5	6
3978	-9.39456e+06	7.03476e+06	3	2	4	1
3980	7.97297e+06	7.03476e+06	4	3	5	6
3981	1.15655e+07	7.03476e+06	5	5	5	6
3982	-1.18997e+07	7.03515e+06	4	2	4	1
3983	-3.29687e+06	7.03515e+06	0	0	0	0
3984	5.46781e+06	7.03515e+06	1	2	2	4
3986	-7.7365e+06	7.03553e+06	3	1	3	0
3987	-7.46009e+06	7.03553e+06	2	1	2	0
3988	9.63103e+06	7.03553e+06	5	5	6	7
3989	9.90744e+06	7.03553e+06	5	5	6	7
3991	-2.70639e+06	7.03505e+06	0	0	0	0
3995	-2.26428e+06	7.03507e+06	0	0	0	0
3999	-4.4954e+06	7.03279e+06	0	0	0	0
4003	-4.64968e+06	7.0327e+06	0	0	0	0
4004	6.82062e+06	7.0327e+06	5	3	5	7
4007	-4.34117e+06	7.03243e+06	0	0	0	0
4010	-8.01148e+06	7.03358e+06	2	1	3	0
4012	9.35605e+06	7.03358e+06	5	5	6	7
4013	1.01824e+07	7.03358e+06	5	5	6	7
4014	-1.03928e+07	7.03216e+06	2	2	3	1
4015	-4.80381e+06	7.03216e+06	1	1	0	1
4016	6.97475e+06	7.03216e+06	5	3	5	7
4021	-1.10094e+07	7.03162e+06	2	2	3	1
4022	-4.18721e+06	7.03162e+06	0	0	0	0
4025	-1.0239e+07	7.03118e+06	2	2	3	1
4026	-4.95758e+06	7.03118e+06	2	1	1	1
4027	7.12852e+06	7.03118e+06	6	3	5	7
4028	1.241e+07	7.03118e+06	5	5	5	6
4029	-9.24337e+06	7.03085e+06	2	2	3	1
4031	8.12416e+06	7.03085e+06	4	3	5	6
4032	1.14143e+07	7.03085e+06	5	5	5	6
4033	-3.14593e+06	7.03131e+06	0	0	0	0
4034	5.31687e+06	7.03131e+06	1	2	2	4
4036	-1.20507e+07	7.03131e+06	4	2	4	1
4045	-1.11629e+07	7.03035e+06	2	2	3	1
4046	-4.03373e+06	7.03035e+06	0	0	0	0
4053	-1.00858e+07	7.02974e+06	2	2	3	1
4054	-5.11077e+06	7.02974e+06	2	2	2	1
4055	7.28171e+06	7.02974e+06	5	3	5	7
4056	1.22568e+07	7.02974e+06	5	5	5	6
4059	8.67528e+06	7.02999e+06	4	3	5	6
4060	1.08632e+07	7.02999e+06	5	5	5	6
4065	-8.28225e+06	7.02969e+06	2	2	3	1
4067	9.08528e+06	7.02969e+06	5	5	6	7
4068	1.04532e+07	7.02969e+06	5	5	6	7
4069	-1.13157e+07	7.02864e+06	2	2	3	1
4070	-3.88094e+06	7.02864e+06	0	0	0	0
4072	1.34866e+07	7.02864e+06	3	3	4	2
4074	-2.55958e+06	7.02954e+06	0	0	0	0
4080	-9.9334e+06	7.02785e+06	2	2	3	1
4081	-5.26319e+06	7.02785e+06	2	2	2	1
4082	7.43413e+06	7.02785e+06	5	3	5	7
4083	1.21043e+07	7.02785e+06	5	5	5	6
4089	-2.12147e+06	7.02833e+06	0	0	0	0
4096	-9.09397e+06	7.02648e+06	2	2	3	1
4098	8.27356e+06	7.02648e+06	4	3	5	6
4099	1.12649e+07	7.02648e+06	5	5	5	6
4100	-1.14676e+07	7.02648e+06	3	2	3	1
4101	-3.72902e+06	7.02648e+06	0	0	0	0
4103	1.36385e+07	7.02648e+06	3	3	4	2
4105	-2.99685e+06	7.02703e+06	0	0	0	0
4106	5.16779e+06	7.02703e+06	1	2	2	4
4108	-9.78193e+06	7.0255e+06	2	2	3	1
4109	-5.41465e+06	7.0255e+06	2	2	2	1
4110	7.5856e+06	7.0255e+06	5	3	5	7
4111	1.19529e+07	7.0255e+06	5	5	5	6
4116	-7.59829e+06	7.02626e+06	3	1	3	0
4117	9.76924e+06	7.02626e+06	5	5	6	7
4129	-7.87025e+06	7.02526e+06	2	1	3	0
4130	-7.32634e+06	7.02526e+06	2	1	2	0
4131	9.49728e+06	7.02526e+06	5	5	6	7
4132	1.00412e+07	7.02526e+06	5	5	6	7
4133	-1.16184e+07	7.02386e+06	3	2	3	1
4134	-3.57819e+06	7.02386e+06	0	0	0	0
4136	1.37893e+07	7.02386e+06	3	3	4	2
4137	-8.54621e+06	7.02392e+06	2	2	3	1
4139	8.82132e+06	7.02392e+06	5	5	6	7
4140	1.07171e+07	7.02392e+06	5	5	5	6
4141	-9.63162e+06	7.02271e+06	3	2	4	1
4143	7.73591e+06	7.02271e+06	5	3	5	7
4144	1.18026e+07	7.02271e+06	5	5	5	6
4146	-2.41532e+06	7.02357e+06	0	0	0	0
4157	-8.94651e+06	7.02164e+06	2	2	3	1
4159	8.42102e+06	7.02164e+06	5	3	5	7
4160	1.11175e+07	7.02164e+06	5	5	5	6
4162	-2.8498e+06	7.02229e+06	0	0	0	0
4163	5.02074e+06	7.02229e+06	0	1	2	3
4165	-8.13929e+06	7.02228e+06	1	1	2	0
4167	9.22824e+06	7.02228e+06	6	5	6	7
4168	1.03102e+07	7.02228e+06	5	5	6	7
4177	-1.1768e+07	7.0208e+06	3	3	4	1
4178	-3.42862e+06	7.0208e+06	0	0	0	0
4181	-9.48262e+06	7.01946e+06	3	2	4	1
4183	7.88491e+06	7.01946e+06	5	3	5	7
4184	1.16536e+07	7.01946e+06	5	5	5	6
4186	-1.98168e+06	7.02113e+06	0	0	0	0
4201	-3.28048e+06	7.01728e+06	0	0	0	0
4202	5.45142e+06	7.01728e+06	1	2	2	4
4204	-1.19161e+07	7.01728e+06	4	3	5	1
4205	-8.40266e+06	7.01735e+06	2	2	3	1
4207	8.96487e+06	7.01735e+06	6	5	6	7
4208	1.05736e+07	7.01735e+06	5	5	6	7
4209	-8.80111e+06	7.01632e+06	2	2	3	1
4211	8.56642e+06	7.01632e+06	5	3	5	7
4212	1.0972e+07	7.01632e+06	5	5	5	6
4214	-2.7049e+06	7.01709e+06	0	0	0	0
4217	-9.3351e+06	7.01576e+06	3	2	4	1
4219	8.03243e+06	7.01576e+06	4	3	5	6
4220	1.1506e+07	7.01576e+06	5	5	5	6
4221	-1.05991e+07	7.01561e+06	2	2	3	1
4222	-4.5975e+06	7.01561e+06	0	0	0	0
4223	6.76844e+06	7.01561e+06	6	3	5	7
4228	-1.0749e+07	7.01555e+06	2	2	3	1
4229	-4.44757e+06	7.01555e+06	0	0	0	0
4230	6.61851e+06	7.01555e+06	3	2	5	5
4233	-2.27372e+06	7.01714e+06	0	0	0	0
4236	-1.04493e+07	7.01522e+06	2	2	3	1
4237	-4.74732e+06	7.01522e+06	1	1	0	1
4238	6.91826e+06	7.01522e+06	5	3	5	7
4240	-1.08988e+07	7.01505e+06	2	2	3	1
4241	-4.29774e+06	7.01505e+06	0	0	0	0
4244	-7.73247e+06	7.01635e+06	3	1	3	0
4245	-7.46412e+06	7.01635e+06	3	1	3	0
4246	9.63506e+06	7.01635e+06	5	5	6	7
4247	9.90341e+06	7.01635e+06	5	5	6	7
4248	-1.02997e+07	7.01438e+06	2	2	3	1
4249	-4.89685e+06	7.01438e+06	2	1	1	1
4250	7.06779e+06	7.01438e+06	5	3	5	7
4251	1.24707e+07	7.01438e+06	5	5	5	6
4252	-1.10484e+07	7.01409e+06	2	2	3	1
4253	-4.14819e+06	7.01409e+06	0	0	0	0
4256	-1.01507e+07	7.01309e+06	2	2	3	1
4257	-5.04589e+06	7.01309e+06	2	2	2	1
4258	7.21683e+06	7.01309e+06	6	3	5	7
4259	1.23216e+07	7.01309e+06	5	5	5	6
4264	-7.99931e+06	7.01431e+06	2	1	3	0
4266	9.36822e+06	7.01431e+06	6	5	6	7
4267	1.01702e+07	7.01431e+06	5	5	6	7
4268	-1.11975e+07	7.01269e+06	2	2	3	1
4269	-3.99913e+06	7.01269e+06	0	0	0	0
4272	-1.20626e+07	7.01331e+06	4	3	5	1
4273	-3.13395e+06	7.01331e+06	0	0	0	0
4274	5.30489e+06	7.01331e+06	1	2	2	4
4290	8.17832e+06	7.0116e+06	5	3	5	7
4291	1.13601e+07	7.0116e+06	5	5	5	6
4292	-9.18921e+06	7.0116e+06	2	2	3	1
4294	1.21733e+07	7.01136e+06	5	5	5	6
4296	-5.19425e+06	7.01136e+06	2	2	2	1
4305	-1.13459e+07	7.01084e+06	3	2	3	1
4306	-3.85073e+06	7.01084e+06	0	0	0	0
4308	1.35168e+07	7.01084e+06	3	4	5	4
4314	-2.56228e+06	7.01144e+06	0	0	0	0
4317	-8.65787e+06	7.01053e+06	2	2	3	1
4319	8.70966e+06	7.01053e+06	6	4	6	7
4320	1.08288e+07	7.01053e+06	5	5	5	6
4325	-9.85483e+06	7.00918e+06	2	2	3	1
4326	-5.34176e+06	7.00918e+06	2	2	2	1
4327	7.5127e+06	7.00918e+06	6	3	5	7
4328	1.20258e+07	7.00918e+06	5	5	5	6
4329	-8.26168e+06	7.01025e+06	2	2	3	1
4331	9.10585e+06	7.01025e+06	6	5	6	7
4332	1.04326e+07	7.01025e+06	5	5	6	7
4334	-2.13486e+06	7.01026e+06	0	0	0	0
4341	-1.14934e+07	7.00855e+06	3	2	3	1
4342	-3.70319e+06	7.00855e+06	0	0	0	0
4344	1.36643e+07	7.00855e+06	3	4	5	4
4346	-2.98918e+06	7.00889e+06	0	0	0	0
4347	5.16012e+06	7.00889e+06	1	2	2	4
4357	-9.04507e+06	7.00698e+06	2	2	3	1
4359	8.32246e+06	7.00698e+06	5	3	5	7
4360	1.1216e+07	7.00698e+06	5	5	5	6
4361	-9.70835e+06	7.00656e+06	2	2	3	1
4362	-5.48824e+06	7.00656e+06	2	2	2	1
4363	7.65918e+06	7.00656e+06	6	3	5	7
4364	1.18793e+07	7.00656e+06	5	5	5	6
4369	-1.16399e+07	7.0058e+06	3	3	4	1
4370	-3.55667e+06	7.0058e+06	0	0	0	0
4372	1.38109e+07	7.0058e+06	3	4	5	4
4373	-7.59829e+06	7.00681e+06	3	1	3	0
4374	9.76924e+06	7.00681e+06	6	5	6	7
4375	-7.8624e+06	7.00576e+06	2	1	3	0
4376	-7.33419e+06	7.00576e+06	3	1	3	0
4377	9.50513e+06	7.00576e+06	6	5	6	7
4378	1.00333e+07	7.00576e+06	5	5	6	7
4380	-2.42204e+06	7.00534e+06	0	0	0	0
4383	-9.56306e+06	7.00349e+06	2	2	3	1
4385	7.80447e+06	7.00349e+06	5	3	5	7
4386	1.1734e+07	7.00349e+06	5	5	5	6
4387	-8.51688e+06	7.00424e+06	2	2	3	1
4389	8.85065e+06	7.00424e+06	6	5	6	7
4390	1.06878e+07	7.00424e+06	5	5	5	6
4400	-2.84629e+06	7.00402e+06	0	0	0	0
4401	5.01724e+06	7.00402e+06	1	2	2	4
4411	-1.17852e+07	7.0026e+06	3	3	4	1
4412	-3.41136e+06	7.0026e+06	0	0	0	0
4414	1.39562e+07	7.0026e+06	3	4	5	4
4415	-8.90281e+06	7.0019e+06	2	2	3	1
4417	8.46472e+06	7.0019e+06	5	3	5	7
4418	1.10738e+07	7.0019e+06	5	5	5	6
4423	9.24417e+06	7.00262e+06	6	5	6	7
4424	1.02943e+07	7.00262e+06	5	5	6	7
4425	-8.12336e+06	7.00262e+06	1	1	2	0
4431	-9.41912e+06	6.99996e+06	3	2	4	1
4433	7.94841e+06	6.99996e+06	5	3	5	7
4434	1.15901e+07	6.99996e+06	5	5	5	6
4442	-1.19292e+07	6.99896e+06	4	3	5	1
4443	-3.2674e+06	6.99896e+06	0	0	0	0
4444	5.43835e+06	6.99896e+06	1	2	2	4
4445	1.41001e+07	6.99896e+06	4	5	5	5
4446	-1.0645e+07	6.99797e+06	2	2	3	1
4447	-4.55158e+06	6.99797e+06	0	0	0	0
4448	6.72252e+06	6.99797e+06	6	3	5	7
4450	-1.04992e+07	6.99772e+06	2	2	3	1
4451	-4.6974e+06	6.99772e+06	1	1	0	1
4452	6.86834e+06	6.99772e+06	6	3	5	7
4454	-1.07909e+07	6.99779e+06	2	2	3	1
4455	-4.4057e+06	6.99779e+06	0	0	0	0
4456	6.57664e+06	6.99779e+06	3	2	5	5
4459	-2.70544e+06	6.99869e+06	0	0	0	0
4462	-1.03536e+07	6.99701e+06	2	2	3	1
4463	-4.84297e+06	6.99701e+06	2	1	1	1
4464	7.01391e+06	6.99701e+06	6	3	5	7
4465	1.25246e+07	6.99701e+06	5	5	5	6
4466	-1.09367e+07	6.99715e+06	2	2	3	1
4467	-4.25994e+06	6.99715e+06	0	0	0	0
4470	-2.28429e+06	6.99878e+06	0	0	0	0
4474	-8.37822e+06	6.99746e+06	2	2	3	1
4476	8.98932e+06	6.99746e+06	6	5	6	7
4477	1.05492e+07	6.99746e+06	5	5	6	7
4482	-9.27666e+06	6.996e+06	2	2	3	1
4484	8.09087e+06	6.996e+06	5	3	5	7
4485	1.14476e+07	6.996e+06	5	5	5	6
4486	-1.02085e+07	6.99587e+06	2	2	3	1
4487	-4.98813e+06	6.99587e+06	3	3	3	2
4489	1.23794e+07	6.99587e+06	5	5	5	6
4492	8.605e+06	6.99636e+06	6	4	6	7
4493	1.09335e+07	6.99636e+06	5	5	5	6
4494	-1.10821e+07	6.99607e+06	2	2	3	1
4495	-4.11448e+06	6.99607e+06	0	0	0	0
4506	-7.72867e+06	6.9966e+06	3	1	3	0
4507	-7.46792e+06	6.9966e+06	3	1	3	0
4508	9.63886e+06	6.9966e+06	6	5	6	7
4509	9.89961e+06	6.9966e+06	5	5	6	7
4513	-1.00639e+07	6.99427e+06	2	2	3	1
4514	-5.1327e+06	6.99427e+06	3	3	3	2
4515	7.30364e+06	6.99427e+06	6	3	5	7
4516	1.22348e+07	6.99427e+06	5	5	5	6
4517	-1.12271e+07	6.99455e+06	2	2	3	1
4518	-3.9695e+06	6.99455e+06	0	0	0	0
4520	1.3398e+07	6.99455e+06	3	4	5	4
4533	-1.20716e+07	6.99486e+06	4	3	5	1
4534	-3.12496e+06	6.99486e+06	0	0	0	0
4535	5.2959e+06	6.99486e+06	1	2	2	4
4536	1.42426e+07	6.99486e+06	4	5	5	5
4537	-7.98776e+06	6.99444e+06	2	1	3	0
4538	-7.20883e+06	6.99444e+06	4	2	3	1
4539	9.37977e+06	6.99444e+06	6	5	6	7
4540	1.01587e+07	6.99444e+06	5	5	6	7
4546	-5.2765e+06	6.99224e+06	3	3	3	3
4547	7.44744e+06	6.99224e+06	6	3	5	7
4548	1.2091e+07	6.99224e+06	5	5	5	6
4553	-1.13714e+07	6.99258e+06	2	2	3	1
4554	-3.82517e+06	6.99258e+06	0	0	0	0
4556	1.35424e+07	6.99258e+06	3	4	5	4
4561	-9.13583e+06	6.99158e+06	2	2	3	1
4563	8.2317e+06	6.99158e+06	5	3	5	7
4564	1.13068e+07	6.99158e+06	5	5	5	6
4566	-2.56671e+06	6.99291e+06	0	0	0	0
4569	-9.77722e+06	6.98976e+06	2	2	3	1
4570	-5.41937e+06	6.98976e+06	2	2	2	1
4571	7.59031e+06	6.98976e+06	6	3	5	7
4572	1.19482e+07	6.98976e+06	5	5	5	6
4573	-8.62432e+06	6.99034e+06	2	2	3	1
4575	8.74321e+06	6.99034e+06	6	5	6	7
4576	1.07953e+07	6.99034e+06	5	5	5	6
4578	-2.1491e+06	6.99176e+06	0	0	0	0
4581	-1.15149e+07	6.99015e+06	3	2	3	1
4582	-3.68166e+06	6.99015e+06	0	0	0	0
4584	1.36859e+07	6.99015e+06	3	4	5	4
4589	1.43834e+07	6.99031e+06	3	4	5	4
4590	-1.22124e+07	6.99031e+06	4	3	5	1
4591	-2.98417e+06	6.99031e+06	0	0	0	0
4592	5.15511e+06	6.99031e+06	1	2	2	4
4593	-8.24194e+06	6.99017e+06	2	2	3	1
4595	9.12559e+06	6.99017e+06	6	5	6	7
4596	1.04129e+07	6.99017e+06	5	5	6	7
4605	-9.63543e+06	6.98684e+06	2	2	3	1
4607	7.7321e+06	6.98684e+06	6	3	5	7
4608	1.18064e+07	6.98684e+06	5	5	5	6
4609	-8.99673e+06	6.98671e+06	2	2	3	1
4611	8.3708e+06	6.98671e+06	6	3	5	7
4612	1.11677e+07	6.98671e+06	5	5	5	6
4613	-1.16575e+07	6.98729e+06	3	3	4	1
4614	-3.53913e+06	6.98729e+06	0	0	0	0
4616	1.38284e+07	6.98729e+06	3	4	5	4
4621	-2.43022e+06	6.98668e+06	0	0	0	0
4628	-7.59829e+06	6.98679e+06	3	1	3	0
4629	9.76924e+06	6.98679e+06	6	5	6	7
4638	-7.85497e+06	6.98567e+06	2	1	3	0
4639	-7.34162e+06	6.98567e+06	3	1	3	0
4640	9.51256e+06	6.98567e+06	6	5	6	7
4641	1.00259e+07	6.98567e+06	5	5	6	7
4643	-2.84516e+06	6.98531e+06	0	0	0	0
4644	5.0161e+06	6.98531e+06	1	2	2	4
4645	1.45224e+07	6.98531e+06	3	4	5	4
4650	-9.49488e+06	6.98347e+06	2	2	3	1
4652	7.87265e+06	6.98347e+06	5	3	5	7
4653	1.16658e+07	6.98347e+06	5	5	5	6
4654	-8.48824e+06	6.98385e+06	2	2	3	1
4656	8.87929e+06	6.98385e+06	6	5	6	7
4657	1.06592e+07	6.98385e+06	5	5	6	7
4658	-1.17988e+07	6.98397e+06	3	3	4	1
4659	-3.39775e+06	6.98397e+06	0	0	0	0
4661	1.39698e+07	6.98397e+06	3	4	5	4
4675	8.50806e+06	6.98139e+06	6	4	6	7
4676	1.10304e+07	6.98139e+06	5	5	5	6
4677	-8.10809e+06	6.98234e+06	2	2	3	1
4678	-7.0885e+06	6.98234e+06	4	2	3	1
4679	9.25944e+06	6.98234e+06	6	5	6	7
4680	1.0279e+07	6.98234e+06	5	5	6	7
4687	-9.3557e+06	6.97967e+06	2	2	3	1
4689	8.01183e+06	6.97967e+06	6	3	5	7
4690	1.15266e+07	6.97967e+06	5	5	5	6
4691	-1.06933e+07	6.97983e+06	2	2	3	1
4692	-4.50328e+06	6.97983e+06	0	0	0	0
4693	6.67422e+06	6.97983e+06	3	2	5	5
4694	1.28643e+07	6.97983e+06	3	4	5	4
4695	-1.05512e+07	6.97971e+06	2	2	3	1
4696	-4.64543e+06	6.97971e+06	1	1	0	1
4697	6.81638e+06	6.97971e+06	6	3	5	7
4698	1.27221e+07	6.97971e+06	3	4	5	4
4699	-1.08355e+07	6.9795e+06	2	2	3	1
4700	-4.36111e+06	6.9795e+06	0	0	0	0
4707	-1.19389e+07	6.9802e+06	4	3	5	1
4708	-3.25766e+06	6.9802e+06	0	0	0	0
4709	5.4286e+06	6.9802e+06	1	2	2	4
4710	1.41099e+07	6.9802e+06	4	5	5	5
4711	-1.04092e+07	6.97916e+06	2	2	3	1
4712	-4.78741e+06	6.97916e+06	3	2	2	2
4713	6.95835e+06	6.97916e+06	6	3	5	7
4715	-1.09775e+07	6.97872e+06	2	2	3	1
4716	-4.21909e+06	6.97872e+06	0	0	0	0
4720	-2.70805e+06	6.97986e+06	0	0	0	0
4721	4.87899e+06	6.97986e+06	1	2	2	4
4723	-1.02675e+07	6.97815e+06	2	2	3	1
4724	-4.92905e+06	6.97815e+06	3	3	3	2
4725	7.09999e+06	6.97815e+06	6	3	5	7
4726	1.24385e+07	6.97815e+06	5	5	5	6
4728	-2.29606e+06	6.97999e+06	0	0	0	0
4739	-1.11192e+07	6.9775e+06	2	2	3	1
4740	-4.0774e+06	6.9775e+06	0	0	0	0
4742	1.32901e+07	6.9775e+06	3	3	4	4
4746	-1.01264e+07	6.97671e+06	2	2	3	1
4747	-5.07017e+06	6.97671e+06	3	3	3	3
4748	7.24111e+06	6.97671e+06	6	3	5	7
4749	1.22974e+07	6.97671e+06	5	5	5	6
4750	-8.35435e+06	6.97687e+06	2	2	3	1
4752	9.01318e+06	6.97687e+06	6	5	6	7
4753	1.05253e+07	6.97687e+06	5	5	6	7
4754	-9.21803e+06	6.97541e+06	2	2	3	1
4756	8.1495e+06	6.97541e+06	6	3	5	7
4757	1.1389e+07	6.97541e+06	5	5	5	6
4758	-1.12604e+07	6.97583e+06	2	2	3	1
4759	-3.93619e+06	6.97583e+06	0	0	0	0
4761	1.34313e+07	6.97583e+06	3	4	5	4
4770	-8.72415e+06	6.97561e+06	2	2	3	1
4772	8.64338e+06	6.97561e+06	6	4	6	7
4773	1.08951e+07	6.97561e+06	5	5	5	6
4779	-5.21063e+06	6.97482e+06	3	3	3	3
4780	7.38157e+06	6.97482e+06	6	3	5	7
4781	1.21569e+07	6.97482e+06	5	5	5	6
4782	-1.20776e+07	6.97599e+06	4	3	5	1
4783	-3.11899e+06	6.97599e+06	0	0	0	0
4784	5.28993e+06	6.97599e+06	1	2	2	4
4785	1.42485e+07	6.97599e+06	3	4	5	4
4786	-7.72509e+06	6.97628e+06	3	1	3	0
4787	-7.4715e+06	6.97628e+06	3	1	3	0
4788	9.64244e+06	6.97628e+06	6	5	6	7
4789	9.89603e+06	6.97628e+06	6	5	6	7
4798	-1.1401e+07	6.97372e+06	2	2	3	1
4799	-3.79564e+06	6.97372e+06	0	0	0	0
4801	1.35719e+07	6.97372e+06	3	4	5	4
4803	-5.35026e+06	6.97249e+06	3	3	3	3
4804	7.5212e+06	6.97249e+06	6	3	5	7
4805	1.20173e+07	6.97249e+06	5	5	5	6
4806	9.3908e+06	6.97396e+06	6	5	6	7
4807	1.01477e+07	6.97396e+06	6	5	6	7
4808	-7.97673e+06	6.97396e+06	3	2	4	1
4809	-7.21986e+06	6.97396e+06	4	2	3	1
4811	-2.57294e+06	6.97396e+06	1	1	2	0
4822	-9.08197e+06	6.97072e+06	2	2	3	1
4824	8.28556e+06	6.97072e+06	6	3	5	7
4825	1.12529e+07	6.97072e+06	5	5	5	6
4827	-2.16429e+06	6.97285e+06	0	0	0	0
4834	-1.15407e+07	6.97116e+06	3	3	4	1
4835	-3.65588e+06	6.97116e+06	0	0	0	0
4837	1.37117e+07	6.97116e+06	3	4	5	4
4839	-2.98188e+06	6.97132e+06	0	0	0	0
4840	5.15282e+06	6.97132e+06	1	2	2	4
4841	1.43857e+07	6.97132e+06	3	4	5	4
4842	-9.70767e+06	6.96972e+06	2	2	3	1
4844	7.65986e+06	6.96972e+06	6	3	5	7
4845	1.18786e+07	6.96972e+06	5	5	5	6
4846	-8.59082e+06	6.96938e+06	2	2	3	1
4848	8.77671e+06	6.96938e+06	6	5	6	7
4849	1.07618e+07	6.96938e+06	5	5	5	6
4850	-8.22267e+06	6.96939e+06	2	2	3	1
4851	-6.97392e+06	6.96939e+06	2	2	2	1
4852	9.14486e+06	6.96939e+06	6	5	6	7
4853	1.03936e+07	6.96939e+06	5	5	6	7
4857	-1.16795e+07	6.96815e+06	4	3	5	1
4858	-3.51708e+06	6.96815e+06	0	0	0	0
4860	1.38505e+07	6.96815e+06	3	4	5	4
4861	-9.57013e+06	6.96651e+06	2	2	3	1
4863	7.7974e+06	6.96651e+06	6	3	5	7
4864	1.17411e+07	6.96651e+06	5	5	5	6
4870	-2.43993e+06	6.96761e+06	0	1	1	0
4877	-8.94765e+06	6.96559e+06	2	2	3	1
4879	8.41989e+06	6.96559e+06	6	4	6	7
4880	1.11186e+07	6.96559e+06	5	5	5	6
4893	1.45211e+07	6.9662e+06	4	5	5	5
4895	-2.84645e+06	6.9662e+06	0	0	0	0
4896	5.01739e+06	6.9662e+06	1	2	2	4
4901	-7.59829e+06	6.96621e+06	4	2	4	1
4902	9.76924e+06	6.96621e+06	7	5	6	7
4903	-1.18172e+07	6.96469e+06	4	3	5	1
4904	-3.37937e+06	6.96469e+06	0	0	0	0
4906	1.39882e+07	6.96469e+06	4	5	5	5
4910	-7.84789e+06	6.96499e+06	3	2	4	1
4911	-7.34869e+06	6.96499e+06	3	1	3	0
4912	9.51964e+06	6.96499e+06	8	5	7	7
4913	1.00188e+07	6.96499e+06	7	5	6	7
4919	-2.03498e+06	6.96526e+06	0	0	0	0
4922	-9.43384e+06	6.96286e+06	2	2	3	1
4924	7.9337e+06	6.96286e+06	6	3	5	7
4925	1.16048e+07	6.96286e+06	5	5	5	6
4930	-8.45954e+06	6.96268e+06	2	2	3	1
4932	8.90799e+06	6.96268e+06	6	5	6	7
4933	1.06305e+07	6.96268e+06	5	5	6	7
4934	-1.06455e+07	6.96125e+06	2	2	3	1
4935	-4.55106e+06	6.96125e+06	0	0	0	0
4936	6.722e+06	6.96125e+06	6	3	5	7
4937	1.28165e+07	6.96125e+06	3	4	5	4
4938	-1.07844e+07	6.96108e+06	2	2	3	1
4939	-4.41221e+06	6.96108e+06	0	0	0	0
4940	6.58316e+06	6.96108e+06	3	2	5	5
4941	1.29553e+07	6.96108e+06	3	4	5	4
4942	-1.05067e+07	6.96098e+06	2	2	3	1
4943	-4.68984e+06	6.96098e+06	2	2	1	2
4944	6.86078e+06	6.96098e+06	6	3	5	7
4945	1.26777e+07	6.96098e+06	3	4	5	4
4950	-1.09231e+07	6.96046e+06	2	2	3	1
4951	-4.27346e+06	6.96046e+06	0	0	0	0
4953	1.30941e+07	6.96046e+06	3	4	5	4
4954	9.2743e+06	6.96139e+06	6	5	6	7
4955	1.02642e+07	6.96139e+06	6	5	6	7
4956	-8.09323e+06	6.96139e+06	2	2	3	1
4957	-7.10336e+06	6.96139e+06	2	2	2	1
4958	-1.03682e+07	6.96026e+06	2	2	3	1
4959	-4.82841e+06	6.96026e+06	3	3	3	2
4960	6.99935e+06	6.96026e+06	6	3	5	7
4961	1.25391e+07	6.96026e+06	5	5	5	6
4962	-1.19537e+07	6.96079e+06	4	3	5	1
4963	-3.24289e+06	6.96079e+06	0	0	0	0
4964	5.41384e+06	6.96079e+06	1	2	2	4
4965	1.41246e+07	6.96079e+06	3	4	5	4
4968	8.55239e+06	6.96001e+06	6	4	6	7
4969	1.09861e+07	6.96001e+06	5	5	5	6
4971	1.32326e+07	6.95939e+06	4	5	5	5
4972	-1.10616e+07	6.95939e+06	2	2	3	1
4973	-4.13496e+06	6.95939e+06	0	0	0	0
4979	-2.7128e+06	6.96064e+06	1	1	2	0
4981	1.46547e+07	6.96064e+06	4	5	5	5
4986	-1.023e+07	6.95911e+06	2	2	3	1
4987	-4.96661e+06	6.95911e+06	3	3	3	3
4988	7.13755e+06	6.95911e+06	6	3	5	7
4989	1.24009e+07	6.95911e+06	5	5	5	6
4990	-9.29892e+06	6.95877e+06	2	2	3	1
4992	8.06861e+06	6.95877e+06	6	3	5	7
4993	1.14699e+07	6.95877e+06	5	5	5	6
4995	-2.3091e+06	6.9608e+06	1	1	0	1
4999	1.33707e+07	6.95788e+06	4	5	5	5
5000	-1.11997e+07	6.95788e+06	2	2	3	1
5001	-3.99685e+06	6.95788e+06	0	0	0	0
5002	-1.70184e+07	6.95988e+06	0	0	0	0
5006	-1.00923e+07	6.9575e+06	2	2	3	1
5007	-5.10429e+06	6.9575e+06	4	4	4	4
5008	7.27523e+06	6.9575e+06	6	3	5	7
5009	1.22632e+07	6.9575e+06	5	5	5	6
5018	-1.13373e+07	6.95592e+06	2	2	3	1
5019	-3.8593e+06	6.95592e+06	0	0	0	0
5021	1.35082e+07	6.95592e+06	4	5	5	5
5023	-3.10778e+06	6.95643e+06	0	0	0	0
5024	5.27872e+06	6.95643e+06	1	2	2	4
5025	1.42597e+07	6.95643e+06	4	5	5	5
5031	-5.24131e+06	6.95546e+06	4	4	4	4
5032	7.41225e+06	6.95546e+06	6	3	5	7
5033	1.21262e+07	6.95546e+06	5	5	5	6
5034	-8.33035e+06	6.95551e+06	2	2	3	1
5035	-6.86624e+06	6.95551e+06	2	2	2	1
5036	9.03718e+06	6.95551e+06	6	5	6	7
5037	1.05013e+07	6.95551e+06	6	5	6	7
5042	-1.71801e+07	6.95657e+06	1	0	1	0
5046	8.20203e+06	6.95423e+06	6	3	5	7
5047	1.13364e+07	6.95423e+06	5	5	5	6
5048	-9.1655e+06	6.95423e+06	2	2	3	1
5050	-8.68455e+06	6.95398e+06	2	2	3	1
5052	8.68298e+06	6.95398e+06	6	4	6	7
5053	1.08555e+07	6.95398e+06	5	5	5	6
5054	-1.14741e+07	6.95352e+06	2	2	3	1
5055	-3.72244e+06	6.95352e+06	0	0	0	0
5057	1.36451e+07	6.95352e+06	4	5	5	5
5058	-7.72169e+06	6.95538e+06	3	2	4	1
5059	-7.4749e+06	6.95538e+06	3	2	3	1
5060	9.64584e+06	6.95538e+06	8	5	7	7
5061	9.89263e+06	6.95538e+06	7	5	6	7
5067	-2.58104e+06	6.95462e+06	1	1	2	0
5071	-5.37752e+06	6.95297e+06	3	3	3	3
5072	7.54846e+06	6.95297e+06	6	3	5	7
5073	1.199e+07	6.95297e+06	5	5	5	6
5078	-7.96603e+06	6.95284e+06	3	2	4	1
5079	-7.23056e+06	6.95284e+06	2	2	2	1
5080	9.4015e+06	6.95284e+06	8	5	7	7
5081	1.0137e+07	6.95284e+06	7	5	6	7
5083	-2.18052e+06	6.95354e+06	1	1	0	1
5086	-1.16102e+07	6.95067e+06	3	3	4	1
5087	-3.58642e+06	6.95067e+06	0	0	0	0
5089	1.37811e+07	6.95067e+06	4	5	5	5
5091	-2.97415e+06	6.95163e+06	1	0	1	0
5092	5.14509e+06	6.95163e+06	1	2	2	4
5093	1.43934e+07	6.95163e+06	4	5	5	5
5094	-1.52234e+07	6.95265e+06	7	5	6	5
5099	7.68372e+06	6.95004e+06	6	3	5	7
5100	1.18547e+07	6.95004e+06	5	5	5	6
5101	-9.03369e+06	6.94926e+06	2	2	3	1
5103	8.33384e+06	6.94926e+06	6	4	6	7
5104	1.12046e+07	6.94926e+06	5	5	5	6
5111	-1.17452e+07	6.94737e+06	4	3	5	1
5112	-3.45138e+06	6.94737e+06	0	0	0	0
5114	1.39162e+07	6.94737e+06	4	5	5	5
5119	-8.55592e+06	6.94751e+06	2	2	3	1
5121	8.81161e+06	6.94751e+06	6	5	6	7
5122	1.07269e+07	6.94751e+06	5	5	6	7
5125	2.72399e+06	6.94965e+06	16	9	8	10
5127	9.16427e+06	6.94785e+06	7	5	6	7
5128	1.03742e+07	6.94785e+06	7	6	6	7
5129	-8.20326e+06	6.94785e+06	2	2	3	1
5130	-6.99333e+06	6.94785e+06	2	2	2	1
5140	-2.45125e+06	6.94815e+06	2	2	2	1
5142	1.49163e+07	6.94815e+06	3	3	5	4
5147	-9.54961e+06	6.94667e+06	2	2	3	1
5149	7.81792e+06	6.94667e+06	6	3	5	7
5150	1.17205e+07	6.94667e+06	5	5	5	6
5151	-1.50642e+07	6.94811e+06	7	5	6	5
5153	2.30335e+06	6.94811e+06	20	10	10	11
5159	-2.84211e+06	6.94637e+06	1	1	2	0
5160	5.01305e+06	6.94637e+06	1	2	2	4
5161	1.45254e+07	6.94637e+06	4	5	5	5
5166	-1.18792e+07	6.94362e+06	4	3	5	1
5167	-3.31744e+06	6.94362e+06	0	0	0	0
5168	5.48838e+06	6.94362e+06	2	3	3	5
5169	1.40501e+07	6.94362e+06	4	5	5	5
5170	-8.90358e+06	6.94385e+06	2	2	3	1
5172	8.46395e+06	6.94385e+06	6	4	6	7
5173	1.10745e+07	6.94385e+06	5	5	5	6
5175	-2.05424e+06	6.94582e+06	1	1	0	1
5177	1.53133e+07	6.94582e+06	3	3	5	4
5178	-1.69249e+07	6.9453e+06	0	0	0	0
5182	-7.59829e+06	6.94506e+06	3	2	4	1
5183	9.76924e+06	6.94506e+06	8	5	7	7
5184	-1.07404e+07	6.94216e+06	2	2	3	1
5185	-4.45621e+06	6.94216e+06	0	0	0	0
5186	6.62715e+06	6.94216e+06	3	2	5	5
5187	1.29113e+07	6.94216e+06	4	5	5	5
5188	-1.06046e+07	6.94219e+06	2	2	3	1
5189	-4.59201e+06	6.94219e+06	2	2	1	2
5190	6.76295e+06	6.94219e+06	6	3	5	7
5191	1.27755e+07	6.94219e+06	4	4	5	5
5192	-7.84108e+06	6.94371e+06	3	2	4	1
5193	-7.3555e+06	6.94371e+06	2	2	3	1
5194	9.52645e+06	6.94371e+06	9	6	8	8
5195	1.0012e+07	6.94371e+06	7	5	6	7
5198	7.95093e+06	6.94286e+06	6	3	5	7
5199	1.15875e+07	6.94286e+06	5	5	5	6
5200	-1.08761e+07	6.94168e+06	2	2	3	1
5201	-4.32045e+06	6.94168e+06	0	0	0	0
5202	6.49139e+06	6.94168e+06	3	2	5	5
5203	1.30471e+07	6.94168e+06	5	5	5	6
5204	-1.04689e+07	6.94178e+06	2	2	3	2
5205	-4.72773e+06	6.94178e+06	3	2	2	2
5206	6.89867e+06	6.94178e+06	6	3	5	7
5207	1.26398e+07	6.94178e+06	5	5	5	6
5208	-1.10117e+07	6.94076e+06	2	2	3	1
5209	-4.18489e+06	6.94076e+06	0	0	0	0
5211	1.31826e+07	6.94076e+06	5	5	5	6
5212	-1.03334e+07	6.94093e+06	2	2	3	2
5213	-4.86322e+06	6.94093e+06	4	4	4	4
5214	7.03416e+06	6.94093e+06	6	3	5	7
5215	1.25043e+07	6.94093e+06	5	5	6	7
5216	-1.49064e+07	6.94295e+06	7	5	6	5
5218	2.46117e+06	6.94295e+06	19	9	9	11
5221	-708917	6.94295e+06	0	0	0	0
5224	-8.42932e+06	6.94059e+06	2	2	3	1
5225	-6.76727e+06	6.94059e+06	2	2	2	1
5226	8.93821e+06	6.94059e+06	7	5	6	7
5227	1.06003e+07	6.94059e+06	7	6	6	7
5228	-1.70842e+07	6.94232e+06	1	0	1	0
5233	-3.18472e+06	6.93943e+06	0	0	0	0
5234	5.35566e+06	6.93943e+06	2	3	3	5
5235	1.41828e+07	6.93943e+06	4	5	5	5
5236	-1.11469e+07	6.93938e+06	2	2	3	1
5237	-4.04968e+06	6.93938e+06	0	0	0	0
5239	1.33179e+07	6.93938e+06	5	5	5	6
5241	-2.71176e+06	6.94067e+06	1	1	2	0
5243	1.46558e+07	6.94067e+06	4	5	5	5
5244	-1.01982e+07	6.93962e+06	3	2	3	2
5245	-4.99834e+06	6.93962e+06	4	4	4	4
5246	7.16928e+06	6.93962e+06	6	3	5	7
5247	1.23692e+07	6.93962e+06	5	5	5	6
5249	-2.32351e+06	6.94123e+06	2	2	2	1
5251	1.5044e+07	6.94123e+06	3	3	5	4
5252	-8.07826e+06	6.9397e+06	2	2	3	1
5253	-7.11833e+06	6.9397e+06	3	3	3	2
5254	9.28927e+06	6.9397e+06	9	6	8	8
5255	1.02492e+07	6.9397e+06	8	6	6	7
5258	8.59227e+06	6.938e+06	6	4	6	7
5259	1.09462e+07	6.938e+06	5	5	5	6
5260	-1.12817e+07	6.93756e+06	2	2	3	1
5261	-3.91494e+06	6.93756e+06	0	0	0	0
5263	1.34526e+07	6.93756e+06	4	5	5	5
5264	-9.2849e+06	6.9386e+06	2	2	3	1
5266	8.08263e+06	6.9386e+06	6	3	5	7
5267	1.14558e+07	6.9386e+06	5	5	5	6
5268	-1.00636e+07	6.93788e+06	4	3	4	3
5269	-5.13296e+06	6.93788e+06	4	4	4	4
5270	7.3039e+06	6.93788e+06	6	3	5	7
5271	1.22346e+07	6.93788e+06	5	5	5	6
5280	-1.53215e+07	6.93873e+06	6	5	5	5
5287	-1.14158e+07	6.9353e+06	2	2	3	1
5288	-3.78081e+06	6.9353e+06	0	0	0	0
5290	1.35867e+07	6.9353e+06	4	5	5	5
5291	-9.92966e+06	6.93569e+06	5	3	5	3
5292	-5.26693e+06	6.93569e+06	4	4	4	4
5293	7.43787e+06	6.93569e+06	6	3	5	7
5294	1.21006e+07	6.93569e+06	5	5	5	6
5298	1.54372e+07	6.93766e+06	4	4	5	5
5300	-3.05335e+06	6.93478e+06	1	1	2	0
5301	5.22429e+06	6.93478e+06	1	2	2	4
5302	1.43142e+07	6.93478e+06	4	5	5	5
5303	-1.47501e+07	6.93718e+06	7	5	6	5
5305	2.6174e+06	6.93718e+06	19	9	9	12
5308	-2.58319e+06	6.93451e+06	2	2	2	1
5310	1.47843e+07	6.93451e+06	4	5	5	5
5312	-862836	6.93563e+06	0	0	0	0
5315	-9.15461e+06	6.93391e+06	2	2	3	1
5317	8.21292e+06	6.93391e+06	6	3	5	7
5318	1.13256e+07	6.93391e+06	5	5	5	6
5319	-8.30478e+06	6.93323e+06	2	2	3	1
5320	-6.8918e+06	6.93323e+06	2	2	2	1
5321	9.06275e+06	6.93323e+06	9	6	8	8
5322	1.04757e+07	6.93323e+06	7	6	6	7
5324	-3.64743e+06	6.93258e+06	0	0	0	0
5326	1.37201e+07	6.93258e+06	5	5	5	6
5327	-9.79645e+06	6.93305e+06	3	3	4	2
5329	7.57108e+06	6.93305e+06	6	3	5	7
5330	1.19674e+07	6.93305e+06	5	5	5	6
5335	-1.51642e+07	6.93451e+06	7	5	6	5
5337	2.20329e+06	6.93451e+06	19	10	9	11
5338	-7.71844e+06	6.93391e+06	3	2	4	1
5339	-7.47815e+06	6.93391e+06	2	2	3	1
5340	9.64909e+06	6.93391e+06	10	7	8	8
5341	9.88938e+06	6.93391e+06	10	7	8	8
5347	-2.19788e+06	6.93385e+06	1	2	1	1
5349	1.51696e+07	6.93385e+06	3	3	5	4
5350	-8.64881e+06	6.93171e+06	2	2	3	1
5352	8.71872e+06	6.93171e+06	6	5	6	7
5353	1.08198e+07	6.93171e+06	6	5	5	6
5359	-2.92343e+06	6.92969e+06	1	1	2	0
5360	5.09437e+06	6.92969e+06	1	2	2	4
5361	1.44441e+07	6.92969e+06	4	5	5	5
5362	-7.95531e+06	6.93102e+06	3	2	4	1
5363	-7.24128e+06	6.93102e+06	3	3	3	2
5364	9.41222e+06	6.93102e+06	10	7	8	8
5365	1.01262e+07	6.93102e+06	8	6	6	7
5367	-3.51493e+06	6.92942e+06	0	0	0	0
5369	1.38526e+07	6.92942e+06	5	5	5	6
5370	-9.66413e+06	6.92997e+06	3	3	4	2
5372	7.70341e+06	6.92997e+06	6	3	5	7
5373	1.18351e+07	6.92997e+06	5	5	5	6
5376	2.77194e+06	6.93081e+06	19	9	9	11
5382	-9.02582e+06	6.92877e+06	2	2	3	1
5384	8.34171e+06	6.92877e+06	6	4	6	7
5385	1.11968e+07	6.92877e+06	5	5	5	6
5386	-1.50082e+07	6.92969e+06	7	5	6	5
5388	2.35929e+06	6.92969e+06	20	10	11	13
5389	1.71792e+07	6.92969e+06	2	0	1	0
5398	-2.45648e+06	6.92791e+06	2	2	2	1
5400	1.4911e+07	6.92791e+06	4	5	5	5
5405	1.55587e+07	6.92903e+06	4	4	5	5
5407	-3.38343e+06	6.92581e+06	0	0	0	0
5408	5.55437e+06	6.92581e+06	2	3	3	5
5409	1.39841e+07	6.92581e+06	4	5	5	5
5412	7.83472e+06	6.92645e+06	6	3	5	7
5413	1.17037e+07	6.92645e+06	5	5	5	6
5422	-8.18232e+06	6.9254e+06	2	2	3	1
5423	-7.01427e+06	6.9254e+06	2	2	2	1
5424	9.18521e+06	6.9254e+06	10	7	8	8
5425	1.03533e+07	6.9254e+06	7	6	6	7
5426	-8.5243e+06	6.92499e+06	2	2	3	1
5427	-6.67228e+06	6.92499e+06	2	2	2	1
5428	8.84323e+06	6.92499e+06	8	6	7	8
5429	1.06952e+07	6.92499e+06	7	6	6	7
5430	-1.24015e+07	6.92414e+06	5	5	5	4
5431	-2.79506e+06	6.92414e+06	2	2	3	1
5433	1.45725e+07	6.92414e+06	4	5	5	5
5435	-2.07443e+06	6.92602e+06	1	2	1	1
5437	1.52931e+07	6.92602e+06	3	3	5	4
5438	-1.06952e+07	6.92279e+06	2	2	3	2
5439	-4.50138e+06	6.92279e+06	0	0	0	0
5440	6.67232e+06	6.92279e+06	4	2	5	6
5441	1.28662e+07	6.92279e+06	5	5	6	7
5442	-1.05622e+07	6.92268e+06	2	2	3	2
5443	-4.63438e+06	6.92268e+06	2	2	1	2
5444	6.80532e+06	6.92268e+06	6	3	5	7
5445	1.27331e+07	6.92268e+06	5	5	6	7
5446	-1.08282e+07	6.92246e+06	2	2	3	2
5447	-4.3684e+06	6.92246e+06	0	0	0	0
5448	6.53934e+06	6.92246e+06	4	2	5	6
5449	1.29991e+07	6.92246e+06	5	5	6	7
5451	-1.54164e+07	6.92434e+06	6	5	5	5
5454	-1.04293e+07	6.92212e+06	2	2	3	2
5455	-4.76728e+06	6.92212e+06	4	4	4	4
5456	6.93822e+06	6.92212e+06	6	3	5	7
5457	1.26003e+07	6.92212e+06	5	5	6	7
5459	-3.25304e+06	6.92175e+06	1	0	1	0
5460	5.42398e+06	6.92175e+06	2	3	3	5
5461	1.41145e+07	6.92175e+06	5	5	5	6
5462	-8.89863e+06	6.92319e+06	2	2	3	1
5464	8.46891e+06	6.92319e+06	6	4	6	7
5465	1.10696e+07	6.92319e+06	5	5	5	6
5466	-1.48536e+07	6.92425e+06	7	6	7	5
5468	2.51391e+06	6.92425e+06	25	14	13	13
5470	-1.0961e+07	6.92168e+06	2	2	3	1
5471	-4.23557e+06	6.92168e+06	0	0	0	0
5472	6.40651e+06	6.92168e+06	3	2	5	5
5473	1.3132e+07	6.92168e+06	5	5	6	7
5476	7.96494e+06	6.92248e+06	6	3	5	7
5477	1.15735e+07	6.92248e+06	5	5	5	6
5478	-7.59829e+06	6.92336e+06	3	2	4	1
5479	9.76924e+06	6.92336e+06	10	7	8	8
5480	-1.44428e+07	6.92383e+06	7	5	6	5
5482	2.92473e+06	6.92383e+06	17	9	9	12
5484	-1.02966e+07	6.92111e+06	3	2	3	2
5485	-4.89994e+06	6.92111e+06	4	4	4	4
5486	7.07088e+06	6.92111e+06	6	3	5	7
5487	1.24676e+07	6.92111e+06	5	5	6	7
5488	-1.10936e+07	6.92046e+06	2	2	3	1
5489	-4.10303e+06	6.92046e+06	0	0	0	0
5491	1.32645e+07	6.92046e+06	5	5	6	7
5492	-7.83433e+06	6.92176e+06	3	2	4	1
5493	-7.36225e+06	6.92176e+06	2	2	3	1
5494	9.5332e+06	6.92176e+06	10	7	8	8
5495	1.00053e+07	6.92176e+06	9	7	7	8
5496	-1.01644e+07	6.91965e+06	4	3	4	3
5497	-5.03224e+06	6.91965e+06	4	4	4	4
5498	7.20318e+06	6.91965e+06	6	3	5	7
5499	1.23353e+07	6.91965e+06	5	5	6	7
5501	-2.33172e+06	6.92085e+06	2	2	2	1
5503	1.50358e+07	6.92085e+06	3	4	5	4
5504	-1.12257e+07	6.91878e+06	2	2	3	1
5505	-3.97091e+06	6.91878e+06	0	0	0	0
5507	1.33966e+07	6.91878e+06	5	5	6	7
5508	-1.25283e+07	6.91814e+06	5	5	5	4
5509	-2.66832e+06	6.91814e+06	3	3	3	2
5511	1.46992e+07	6.91814e+06	4	5	5	5
5512	-1.52612e+07	6.92045e+06	7	5	6	5
5514	2.10636e+06	6.92045e+06	22	11	10	12
5515	-8.40179e+06	6.91783e+06	2	2	3	1
5516	-6.79479e+06	6.91783e+06	2	2	2	1
5517	8.96574e+06	6.91783e+06	10	7	8	8
5518	1.05727e+07	6.91783e+06	7	6	6	7
5519	-1.20727e+07	6.91725e+06	5	5	5	4
5520	-3.12388e+06	6.91725e+06	1	1	2	0
5521	5.29482e+06	6.91725e+06	2	3	3	5
5522	1.42437e+07	6.91725e+06	5	5	5	6
5523	-1.00325e+07	6.91775e+06	5	3	5	3
5524	-5.16405e+06	6.91775e+06	4	4	4	4
5525	7.33499e+06	6.91775e+06	6	3	5	7
5526	1.22035e+07	6.91775e+06	5	5	6	7
5531	-9.27359e+06	6.91807e+06	2	2	3	1
5533	8.09394e+06	6.91807e+06	6	3	5	7
5534	1.14445e+07	6.91807e+06	5	5	5	6
5538	1.56779e+07	6.91995e+06	3	2	4	4
5540	1.35282e+07	6.91666e+06	5	5	6	7
5541	-1.13573e+07	6.91666e+06	2	2	3	1
5542	-3.83934e+06	6.91666e+06	0	0	0	0
5543	-8.0619e+06	6.91711e+06	2	2	3	1
5544	-7.13469e+06	6.91711e+06	3	3	3	2
5545	9.30563e+06	6.91711e+06	10	7	8	8
5546	1.02328e+07	6.91711e+06	8	6	6	7
5555	8.59444e+06	6.91717e+06	6	4	6	7
5556	1.0944e+07	6.91717e+06	5	5	5	6
5557	-1.47005e+07	6.91821e+06	7	6	7	5
5559	2.66704e+06	6.91821e+06	23	13	13	13
5568	1.54143e+07	6.91774e+06	3	3	5	4
5569	-9.90134e+06	6.91541e+06	5	3	5	3
5570	-5.29525e+06	6.91541e+06	4	4	4	4
5571	7.46619e+06	6.91541e+06	6	3	5	7
5572	1.20723e+07	6.91541e+06	5	5	6	7
5578	-3.70843e+06	6.91409e+06	0	0	0	0
5580	1.36591e+07	6.91409e+06	5	5	6	7
5581	-1.5107e+07	6.91596e+06	7	6	7	5
5583	2.2605e+06	6.91596e+06	23	12	12	13
5584	-1.42918e+07	6.91625e+06	7	5	6	5
5586	3.07572e+06	6.91625e+06	17	9	9	11
5592	-1.22005e+07	6.91229e+06	5	5	5	4
5593	-2.99605e+06	6.91229e+06	2	2	3	1
5595	1.43715e+07	6.91229e+06	5	5	5	6
5596	-9.14588e+06	6.91321e+06	2	2	3	1
5598	8.22165e+06	6.91321e+06	6	4	6	7
5599	1.13168e+07	6.91321e+06	5	5	5	6
5600	-9.77086e+06	6.91261e+06	5	3	5	3
5602	7.59667e+06	6.91261e+06	6	3	5	7
5603	1.19418e+07	6.91261e+06	5	5	6	7
5604	-1.26533e+07	6.9117e+06	4	5	4	4
5605	-2.54331e+06	6.9117e+06	3	3	3	2
5607	1.48242e+07	6.9117e+06	4	5	5	5
5609	-2.20895e+06	6.91334e+06	1	2	1	1
5611	1.51586e+07	6.91334e+06	3	4	5	4
5613	-3.57831e+06	6.91107e+06	0	0	0	0
[truncated: 62,143 more rows]
